# Supplementary material
Source: Research Square preprint supplement (doi:10.21203/rs.3.rs-9224431/v1)
Supplement: Supplementary file 1 [file 206af36b61912a5240617135.docx]

**Supplementary Table 2.** Descriptive characteristics of females (n=313) and males (n=300) in moment 1 (baseline) are expressed as mean ± standard deviation or proportions (cross-sectional analytical sample).

|  | **Total (n=613)** | **Females (n=313)** | **Males (n=300)** |
| --- | --- | --- | --- |
| Mean, N (SD, %) | Mean, N (SD, %) | Mean, N (SD, %) |
| Age (y) | 13.88 (2.09) | 13.83 (2.10) | 13.93 (2.09) |
| Body Mass (kg) | 51.86 (13.01) | 50.32 (10.77) | 53.46 (14.84) |
| Body Mass Index (kg/m2) | 20.33 (3.50) | 20.48 (3.47) | 20.17 (3.54) |
| Body Mass Index (z-score)# | 0.28 (1.07) | 0.27 (1.05) | 0.28 (1.09) |
| Stature (m) | 1.59 (0.11) | 1.56 (0.78) | 1.61 (0.13) |
| Stature (z-score)# | 0.05 (0.88) | -0.01 (0.91) | 0.12 (0.85) |
| Arm length (m) | 0.71 (0.05) | 0.69 (0.04) | 0.72 (0.06) |
| Leg length (m) | 0.76 (0.06) | 0.74 (0.04) | 0.77 (0.06) |
| **Ethnicity** | | | |
| White / Caucasian | 549 (89.56) | 281 (89.78) | 268 (89.33) |
| Black / African American | 50 (8.16) | 25 (7.99) | 25 (8.33) |
| Asian | 11 (1.79) | 5 (1.60) | 6 (2.00) |
| Other | 3 (0.49) | 2 (0.64) | 1 (0.33) |
| ***Dominant arm*** | | | |
| PhA (º, degrees) | 4.43 (0.90) | 4.17 (0.74) | 4.70 (0.97) |
| R (Ω, ohms) | 330.22 (56.12) | 351.09 (45.91) | 308.38 (57.58) |
| RI (Ω/m) | 134.53 (35.80) | 145.47 (27.55) | 123.08 (39.71) |
| RI-specific (Ω/m) | 682.41 (185.25) | 737.40 (145.06) | 624.85 (204.52) |
| Xc (Ω) | 24.96 (3.80) | 25.25 (3.72) | 24.67 (3.86) |
| XcI (Ω/m) | 10.05 (2.15) | 10.43 (1.90) | 9.66 (2.32) |
| XcI-specific (Ω/m) | 51.02 (11.4) | 52.85 (10.10) | 49.10 (12.36) |
| Xcp (Ω) | 112193.27 (37558.45) | 125365.11 (33580.7) | 98404.68 (36587.50) |
| XcpI (Ω/m) | 46238.29 (19321.01) | 52128.51 (16638.39) | 40072.26 (20024.05) |
| XcpI-specific (Ω/m) | 234452.28 (98459.59) | 264175.42 (85118.03) | 203337.42 (101940.08) |
| Cap (pF) | 32.04 (12.19) | 27.12 (6.910) | 37.19 (14.24) |
| FM (g) | 635.64 (389.55) | 745.27 (390.40) | 521.26 (354.76) |
| LST (g) | 1945.30 (643.80) | 1686.32 (337.24) | 2215.50 (765.65) |
| BMC (g) | 99.47 (34.89) | 95.38 (25.71) | 103.73 (42.03) |
| ***Non-dominant arm*** | | | |
| PhA (º) | 4.22 (0.90) | 3.96 (0.73) | 4.50 (0.97) |
| R (Ω) | 335.74 (57.77) | 356.82 (50.14) | 313.68 (57.06) |
| RI (Ω/m) | 136.76 (36.55) | 147.92 (29.43) | 125.08 (39.55) |
| RI-specific (Ω/m) | 693.59 (188.34) | 749.61 (152.73) | 634.94 (203.87) |
| Xc (Ω) | 24.20 (4.01) | 24.37 (4.32) | 24.03 (3.66) |
| XcI (Ω/m) | 9.74 (2.17) | 10.07 (2.12) | 9.40 (2.17) |
| XcI-specific (Ω/m) | 49.44 (11.36) | 51.03 (10.95) | 47.77 (11.57) |
| Xcp (Ω) | 116054.83 (40404.40) | 129824.39 (39093.56) | 101640.54 (36598.97) |
| XcpI (Ω/m) | 47817.08 (20516.59) | 54040.03 (18964.60) | 41306.85 (20082.25) |
| XcpI-specific (Ω/m) | 242355.07 (103784.50) | 273660.96 (95365.16) | 209583.34 (102253.94) |
| Cap (pF) | 31.00 (11.83) | 26.37 (6.89) | 35.84 (13.84) |
| FM (g) | 665.18 (389.45) | 773.06 (385.56) | 552.62 (361.16) |
| LST (g) | 1789.09 (581.15) | 1545.38 (297.13) | 2043.36 (687.11) |
| BMC (g) | 91.59 (31.63) | 88.33 (24.33) | 95.00 (37.51) |

| ***Dominant leg*** | | | |
| --- | --- | --- | --- |
| PhA (º) | 5.61 (1.00) | 5.38 (0.88) | 5.86 (1.07) |
| R (Ω) | 273.16 (39.06) | 290.65 (33.99) | 254.96 (35.56) |
| RI (Ω/m) | 110.71 (25.5) | 120.19 (20.48) | 100.85 (26.49) |
| RI-specific (Ω/m) | 489.65 (114.15) | 538.77 (91.27) | 438.56 (113.25) |
| Xc (Ω) | 26.51 (4.31) | 27.17 (4.19) | 25.82 (4.33) |
| XcI (Ω/m) | 10.64 (2.18) | 11.20 (2.00) | 10.06 (2.22) |
| XcI-specific (Ω/m) | 47.19 (10.36) | 50.36 (9.73) | 43.89 (9.98) |
| Xcp (Ω) | 76137.06 (21747.58) | 85631.22 (20356.44) | 66263.13 (18536.01) |
| XcpI (Ω/m) | 31078.11 (11074.11) | 35480.86 (9950.21) | 26499.25 (10313.12) |
| XcpI-specific (Ω/m) | 137295.90 (48688.13) | 158725.08 (43198.55) | 115009.55 (43881.74) |
| Cap (pF) | 45.46 (13.98) | 39.22 (9.17) | 51.95 (15.13) |
| FM (g) | 2734.35 (1323.92) | 3207.41 (1220.79) | 2240.79 (1246.50) |
| LST (g) | 6426.59 (1841.56) | 5710.02 (1120.28) | 7174.2 (2129.23) |
| BMC (g) | 309.38 (95.42) | 287.17 (66.10) | 332.55 (114.12) |
| ***Non-dominant leg*** | | | |
| PhA (º) | 5.45 (1.00) | 5.17 (0.86) | 5.75 (1.06) |
| R (Ω) | 276.22 (40.79) | 295.12 (35.91) | 256.50 (36.00) |
| RI (Ω/m) | 112.05 (26.27) | 122.09 (20.99) | 101.57 (27.15) |
| RI-specific (Ω/m) | 495.67 (118.13) | 547.44 (94.40) | 441.66 (116.32) |
| Xc (Ω) | 25.97 (4.09) | 26.42 (3.88) | 25.50 (4.25) |
| XcI (Ω/m) | 10.43 (2.12) | 10.89 (1.86) | 9.95 (2.26) |
| XcI-specific (Ω/m) | 46.23 (9.99) | 48.96 (9.11) | 43.38 (10.10) |
| Xcp (Ω) | 77959.45 (23151.81) | 88384.04 (22120.00) | 67083.14 (18817.32) |
| XcpI (Ω/m) | 31858.99 (11616.05) | 36627.80 (10479.19) | 26883.54 (10627.83) |
| XcpI-specific (Ω/m) | 140810.98 (51406.6) | 163943.87 (45993.95) | 116675.67 (45353.57) |
| Cap (pF) | 44.60 (13.91) | 38.12 (8.94) | 51.36 (14.93) |
| FM (g) | 2824.45 (1348.49) | 3297.00 (1236.61) | 2331.42 (1283.99) |
| LST (g) | 6385.97 (1827.85) | 5668.09 (1120.74) | 7134.96 (2103.68) |
| BMC (g) | 317.31 (99.44) | 292.04 (66.61) | 343.66 (119.35) |
| ***Additional information*** | | | |
| Chronic disease (%Yes)† | 106 (17.29) | 61 (19.49) | 45 (15.00) |
| Osmolality (mOsm/kg H2O) | 45.24 (22.74) | 44.44 (21.78) | 46.06 (23.69) |
| Fasting time (hours) | 10.37 (2.76) | 10.31 (2.90) | 10.43 (2.60) |
| Body temperature (ºC) | 36.29 (0.44) | 36.26 (0.47) | 36.33 (0.41) |
| Menstruation (%Yes) | - | 274 (87.54) | - |
| Abbreviations: BMC, bone mineral content; Cap, capacitance; FM, fat mass; LST, lean soft tissue; PhA, phase angle; R, resistance in series; RI, resistance in series normalized to stature; RI-specific, resistance in series normalized to segment length; SD, standard deviation; Xc, capacitive reactance in series; XcI, capacitive reactance in series normalized to stature; XcI-specific, capacitive reactance in series normalized to segment length; Xcp, capacitive reactance in parallel; XcpI, capacitive reactance in parallel normalized to stature; XcpI-specific, capacitive reactance in parallel normalized to segment length.  # BMI-for-age and stature-for-age z-scores were calculated based on the WHO growth reference for children and adolescents aged 5-19 years. † Chronic diseases (ICD-10 Classification) included: certain infectious and parasitic diseases; diseases of the skin and subcutaneous tissue; circulatory system; digestive system; genitourinary system; respiratory system; blood and blood-forming organs and immune disorders; nervous system; musculoskeletal system and connective tissue; and mental and behavioral disorders. | | | |
