# Supplementary material
Source: Research Square preprint supplement (doi:10.21203/rs.3.rs-9224431/v1)
Supplement: Supplementary file 2 [file 9b7be8b7d40570834ecaa6fa.docx]

**Table 3.** Comparison of the explained variance of regional resistance normalized to stature versus regional resistance normalized to segment length in relation to regional body components in both cross-sectional and prospective analyses (adjusted models).

|  | | Cross-sectional analysis (n=613) | | Prospective analysis  (n=562) | |
| --- | --- | --- | --- | --- | --- |
|  |  |  |  |
| RI | RI-specific | Δ RI | Δ RI-specific |
| M2 (R2Part) | M2 (R2Part) | M2 (R2Part) | M2 (R2Part) |
| ***Females*** *(n=313; n=290)* | | | | | |
| LST | *Dominant Arm* | 42.45 | 44.56 | 13.23 | 12.50 |
| *Non-dominant Arm* | 41.02 | 43.57 | 11.11 | 11.71 |
| *Dominant Leg* | 30.39 | 30.80 | **4.81** | **8.27** |
| *Non-dominant Leg* | 30.31 | 30.11 | **3.30** | **7.13** |
| FM | *Dominant Arm* | 1.76 | 1.74 | - | - |
| *Non-dominant Arm* | 1.28 | 1.38 | - | - |
| *Dominant Leg* | - | - | - | - |
| *Non-dominant Leg* | - | - | - | - |
| BMC | *Dominant Arm* | 26.86 | 28.62 | 4.46 | 5.88 |
| *Non-dominant Arm* | 23.85 | 25.54 | 4.19 | 5.79 |
| *Dominant Leg* | 23.38 | 26.07 | **1.35** | **3.17** |
| *Non-dominant Leg* | 23.33 | 24.92 | **1.39** | **3.51** |
| ***Males*** *(n=300; n=272)* | | | | | |
| LST | *Dominant Arm* | 51.32 | 51.51 | 23.92 | 23.09 |
| *Non-dominant Arm* | 52.54 | 52.91 | 26.26 | 23.44 |
| *Dominant Leg* | 50.22 | 49.72 | 14.50 | 14.90 |
| *Non-dominant Leg* | 52.72 | 51.35 | 15.20 | 15.15 |
| FM | *Dominant Arm* | 17.12 | 16.32 | - | - |
| *Non-dominant Arm* | 15.52 | 14.81 | - | - |
| *Dominant Leg* | 12.46 | 9.95 | - | - |
| *Non-dominant Leg* | 12.17 | 9.35 | - | - |
| BMC | *Dominant Arm* | 40.71 | 41.16 | 12.81 | 11.35 |
| *Non-dominant Arm* | 39.52 | 39.96 | 17.38 | 15.52 |
| *Dominant Leg* | 42.18 | 42.04 | 8.46 | 9.00 |
| *Non-dominant Leg* | 42.46 | 41.67 | 7.91 | 8.86 |
| Bolded coefficients represent differences between RI and RI-specific at the 95% confidence level (p<0.05), according to Z-Steiger’s Z test.  Dashes (“-“) represent no significant associations between regional RI or RI-specific and regional body composition.  Cross-sectional models: adjusted for ethnicity, chronic diseases, salivary osmolality, body mass index, fasting time, body temperature + menstruation condition (females).  Prospective models: adjusted for ethnicity, presence of chronic diseases, body mass index, age at baseline, each raw bioelectrical impedance variable at baseline, and each body component at baseline.  Abbreviations: BMC, bone mineral content; FM, fat mass; LST, lean soft tissue; RI, resistance index (normalized to height); RI-specific, resistance index (normalized to segment length). | | | | | |
