# Supplementary material
Source: Research Square preprint supplement (doi:10.21203/rs.3.rs-9224431/v1)
Supplement: Supplementary file 3 [file 9c516911c159e78ca515b6a4.docx]

**Table 1.** Sex-stratified standardized regression coefficients describing the cross-sectional association between regional raw bioelectrical impedance analysis variables and regional DXA-derived body components (adjusted models; by limb and dominance; n=613).

|  | | **Lean Soft Tissue** | | | |  | **Fat Mass** | | | |  | **Bone Mineral Content** | | | |
| --- | --- | --- | --- | --- | --- | --- | --- | --- | --- | --- | --- | --- | --- | --- | --- |
| Arm | | Leg | |  | Arm | | Leg | |  | Arm | | Leg | |
| *Dom* | *Non Dom* | *Dom* | *Non Dom* |  | *Dom* | *Non Dom* | *Dom* | *Non Dom* |  | *Dom* | *Non Dom* | *Dom* | *Non Dom* |
| ***Females*** *(n=313)* | | | | | | | | | | | | | | | |
| PhA |  | **0.442** | **0.418** | **0.283** | **0.284** |  | **-0.214** | **-0.189** | **-0.193** | **-0.150** |  | **0.310** | **0.320** | **0.241** | **0.265** |
| RI |  | **-0.794** | **-0.805** | **-0.661** | **-0.651** |  | **0.162** | **0.142** | 0.054 | 0.035 |  | **-0.632** | **-0.614** | **-0.580** | **-0.571** |
| RI-specific |  | **-0.822** | **-0.832** | **-0.611** | **-0.598** |  | **0.163** | **0.148** | 0.009 | -0.002 |  | **-0.659** | **-0.637** | **-0.562** | **-0.544** |
| XcI |  | **-0.254** | **-0.209** | **-0.261** | **-0.268** |  | -0.056 | -0.059* | **-0.109** | **-0.100** |  | **-0.234** | **-0.162** | **-0.230** | **-0.221** |
| XcI-specific |  | **-0.287** | **-0.233** | **-0.275** | **-0.278** |  | -0.051 | -0.051 | **-0.127** | **-0.115** |  | **-0.263** | **-0.182** | **-0.261** | **-0.247** |
| XcpI |  | **-0.713** | **-0.672** | **-0.536** | **-0.513** |  | **0.193** | **0.163** | **0.109** | **0.088** |  | **-0.514** | **-0.451** | **-0.421** | **-0.398** |
| XcpI-specific |  | **-0.747** | **-0.710** | **-0.533** | **-0.504** |  | **0.197** | **0.172** | **0.076** | 0.060 |  | **-0.544** | **-0.482** | **-0.438** | **-0.406** |
| Cap |  | **0.564** | **0.602** | **0.287** | **0.308** |  | **-0.223** | **-0.221** | **-0.168** | **-0.149** |  | **0.327** | **0.332** | 0.116 | **0.143** |
| ***Males*** *(n=300)* | | | | | | | | | | | | | | | |
| PhA |  | **0.602** | **0.595** | **0.471** | **0.447** |  | **-0.419** | **-0.401** | **-0.432** | **-0.409** |  | **0.585** | **0.576** | **0.497** | **0.462** |
| RI |  | **-0.849** | **-0.864** | **-0.811** | **-0.844** |  | **0.490** | **0.470** | **0.404** | **0.406** |  | **-0.756** | **-0.749** | **-0.744** | **-0.758** |
| RI-specific |  | **-0.863** | **-0.879** | **-0.789** | **-0.811** |  | **0.486** | **0.465** | **0.353** | **0.346** |  | **-0.772** | **-0.764** | **-0.726** | **-0.731** |
| XcI |  | **-0.498** | **-0.499** | **-0.457** | **-0.472** |  | **0.228** | **0.205** | 0.081* | **0.085** |  | **-0.413** | **-0.396** | **-0.381** | **-0.387** |
| XcI-specific |  | **-0.494** | **-0.499** | **-0.433** | **-0.447** |  | **0.216** | **0.195** | 0.042 | 0.042 |  | **-0.415** | **-0.400** | **-0.363** | **-0.369** |
| XcpI |  | **-0.792** | **-0.809** | **-0.722** | **-0.765** |  | **0.492** | **0.473** | **0.400** | **0.405** |  | **-0.692** | **-0.686** | **-0.642** | **-0.668** |
| XcpI-specific |  | **-0.809** | **-0.828** | **-0.721** | **-0.757** |  | **0.494** | **0.475** | **0.372** | **0.370** |  | **-0.708** | **-0.702** | **-0.643** | **-0.663** |
| Cap |  | **0.838** | **0.835** | **0.507** | **0.573** |  | **-0.583** | **-0.545** | **-0.368** | **-0.390** |  | **0.721** | **0.695** | **0.423** | **0.463** |
| Values are standardized regression coefficients (*β*). Bolded coefficients represent significant associations at the 95% confidence level (p<0.05).  * Additional non-significant associations following Benjamini–Hochberg False Discovery Rate procedures.  Models adjusted for ethnicity, chronic diseases, salivary osmolality, body mass index, fasting time, body temperature + menstruation condition (females).  Abbreviations: Cap, capacitance; Dom, dominant side; Non-Dom, non-dominant side; PhA, phase angle; RI, resistance index (normalized to height); RI-specific, resistance index (normalized to segment length); XcI, capacitive reactance index (normalized to height); XcI-specific, capacitive reactance index (normalized to segment length); XcpI, parallel-transformed capacitive reactance index (normalized to height); XcpI-specific, parallel-transformed capacitive reactance index (normalized to segment length). | | | | | | | | | | | | | | | |

**Table 2.** Sex-stratified standardized regression coefficients describing the prospective association between one-year changes in regional raw bioelectrical impedance analysis variables and one-year changes in regional DXA-derived body components (adjusted models; by limb and dominance; n=562).

|  | | Δ **Lean Soft Tissue** | | | |  | Δ **Fat Mass** | | | |  | Δ **Bone Mineral Content** | | | |
| --- | --- | --- | --- | --- | --- | --- | --- | --- | --- | --- | --- | --- | --- | --- | --- |
| Arm | | Leg | |  | Arm | | Leg | |  | Arm | | Leg | |
| *Dom* | *Non Dom* | *Dom* | *Non Dom* |  | *Dom* | *Non Dom* | *Dom* | *Non Dom* |  | *Dom* | *Non Dom* | *Dom* | *Non Dom* |
| ***Females*** *(n=290)* | | | | | | | | | | | | | | | | |
| Δ PhA |  | **0.225** | **0.203** | 0.040 | **0.126** |  | -0.014 | -0.062 | -0.032 | -0.071 |  | 0.088 | 0.045 | 0.026 | 0.013 | | |
| Δ RI |  | **-0.442** | **-0.443** | **-0.290** | **-0.219** |  | 0.025 | 0.014 | 0.094 | -0.004 |  | **-0.253** | **-0.262** | **-0.136** | **-0.138** | | |
| Δ RI-specific |  | **-0.423** | **-0.454** | **-0.374** | **-0.333** |  | 0.013 | 0.008 | 0.147* | 0.046 |  | **-0.285** | **-0.303** | **-0.218** | **-0.229** | | |
| Δ XcI |  | -0.111 | -0.113 | -0.107 | -0.047 |  | -0.053 | -0.123 | -0.026 | -0.091 |  | **-0.154** | **-0.174** | -0.086 | **-0.096** | | |
| Δ XcI-specific |  | **-0.134** | **-0.136** | **-0.176** | -0.104 |  | -0.057 | -0.121 | 0.018 | -0.035 |  | **-0.183** | **-0.204** | **-0.122** | **-0.138** | | |
| Δ XcpI |  | **-0.365** | **-0.360** | **-0.300** | **-0.217** |  | 0.015 | 0.016 | 0.059 | -0.025 |  | **-0.215** | **-0.200** | **-0.142** | **-0.147** | | |
| Δ XcpI Specific |  | **-0.377** | **-0.381** | **-0.286** | **-0.246** |  | 0.012 | 0.015 | 0.100 | 0.010 |  | **-0.241** | **-0.228** | **-0.156** | **-0.168** | | |
| Δ Cap |  | **0.323** | 0.110 | **0.138** | **0.196** |  | -0.020 | -0.054 | -0.107 | -0.002 |  | **0.159** | **0.105** | 0.074 | 0.085 | | |
| ***Males*** *(n=272)* | | | | | | | | | | | | | | | | |
| Δ PhA |  | **0.219** | **0.320** | **0.136** | 0.109 |  | -0.063 | -0.119 | -0.102 | -0.179* |  | **0.204** | **0.244** | **0.163** | **0.110** |
| Δ RI |  | **-0.573** | **-0.593** | **-0.456** | **-0.463** |  | 0.004 | -0.019 | -0.042 | 0.005 |  | **-0.421** | **-0.484** | **-0.340** | **-0.331** |
| Δ RI-specific |  | **-0.545** | **-0.544** | **-0.482** | **-0.493** |  | -0.030 | -0.073 | -0.024 | 0.032 |  | **-0.382** | **-0.444** | **-0.368** | **-0.375** |
| Δ XcI |  | **-0.318** | **-0.280** | **-0.281** | **-0.282** |  | -0.027 | -0.085 | -0.060 | -0.111 |  | **-0.262** | **-0.293** | **-0.198** | **-0.201** |
| Δ XcI-specific |  | **-0.341** | **-0.275** | **-0.284** | **-0.279** |  | -0.046 | -0.125 | -0.054 | -0.099 |  | **-0.252** | **-0.285** | **-0.203** | **-0.205** |
| Δ XcpI |  | **-0.507** | **-0.522** | **-0.414** | **-0.438** |  | -0.029 | -0.057 | -0.051 | 0.007 |  | **-0.361** | **-0.419** | **-0.311** | **-0.311** |
| Δ XcpI-specific |  | **-0.507** | **-0.506** | **-0.411** | **-0.433** |  | -0.044 | -0.086 | -0.051 | 0.009 |  | **-0.346** | **-0.405** | **-0.309** | **-0.315** |
| Δ Cap |  | **0.520** | **0.551** | **0.449** | **0.444** |  | -0.004 | -0.008 | -0.015 | -0.020 |  | **0.316** | **0.375** | **0.321** | **0.276** |
| Values are standardized regression coefficients (*β*). Bolded coefficients represent significant associations at the 95% confidence level (p<0.05).  * Additional non-significant associations following Benjamini–Hochberg False Discovery Rate procedures.  Models adjusted for ethnicity, presence of chronic diseases, body mass index, age at baseline, each raw bioelectrical impedance variable at baseline, and each body component at baseline.  Abbreviations: Δ, proportion of change relative to baseline; Cap, capacitance; Dom, dominant side; Non-Dom, non-dominant side; PhA, phase angle; RI, resistance index (normalized to height); RI-specific, resistance index (normalized to segment length); XcI, capacitive reactance index (normalized to height); XcI-specific, capacitive reactance index (normalized to segment length); XcpI, parallel-transformed capacitive reactance index (normalized to height); XcpI-specific, parallel-transformed capacitive reactance index (normalized to segment length). | | | | | | | | | | | | | | | | |
