# Supplementary material
Source: Research Square preprint supplement (doi:10.21203/rs.3.rs-9224431/v1)
Supplement: Supplementary file 4 [file c834dcb97ade7e355b204e7a.docx]

**Supplementary Table 3.** Descriptive characteristics of females (n=290) and males (n=272) in moments 1 and 2 are expressed as mean ± standard deviation and proportions of change (prospective analytical sample).

|  | **Females (n=290)** | | | **Males (n=272)** | | |
| --- | --- | --- | --- | --- | --- | --- |
| Moment 1 | Moment 2 | **Diff** | Moment 1 | Moment 2 | **Diff** |
| Mean (SD) | Mean (SD) | % | Mean (SD) | Mean (SD) | % |
| Age (y) | 13.86 (2.12) | 14.85 (2.11)* | 7.36 | 13.90 (2.11) | 14.89 (2.10)* | 7.30 |
| Body Mass (kg) | 50.58 (10.69) | 52.91 (10.18)* | 5.31 | 53.71 (15.02) | 57.40 (14.05)* | 8.00 |
| BMI (kg/m2) | 20.54 (3.45) | 20.92 (3.39)* | 2.12 | 20.27 (3.56) | 20.68 (3.49)* | 2.27 |
| BMI (z-score)# | 0.30 (1.04) | 0.22 (1.02)* | -26.67 | 0.34 (1.07) | 0.24 (1.05)* | -29.41 |
| Stature (m) | 156.42 (7.70) | 158.74 (6.25)* | 1.54 | 161.39 (12.84) | 165.61 (10.95)* | 2.74 |
| Stature (z-score)# | 0.04 (0.91) | -0.05 (0.85)* | -90.00 | 0.17 (0.81) | 0.09 (0.82)* | -47.06 |
| Arm length (m) | 0.70 (0.04) | 0.71 (0.03)* | 1.44 | 0.72 (0.06) | 0.74 (0.05)* | 2.85 |
| Leg length (m) | 0.74 (0.04) | 0.75 (0.04)* | 1.10 | 0.77 (0.06) | 0.79 (0.05)* | 2.66 |
| ***Dominant arm*** | | | | | | |
| PhA (º) | 4.18 (0.74) | 4.44 (0.67)* | 7.62 | 4.69 (0.99) | 5.17 (1.00)* | 11.62 |
| R (Ω) | 349.95 (45.81) | 340.91 (43.35)* | -2.33 | 308.57 (58.54) | 291.98 (52.52)* | -4.89 |
| RI (Ω/m) | 144.51 (26.87) | 136.09 (21.79)* | -5.15 | 123.32 (39.84) | 109.57 (31.94)* | -9.66 |
| RI-specific (Ω/m) | 732.24 (141.45) | 689.92 (114.44)* | -4.82 | 626.35 (205.55) | 554.14 (167.75)* | -9.78 |
| Xc (Ω) | 25.25 (3.74) | 26.17 (3.28)* | 5.11 | 24.63 (3.90) | 25.74 (3.13) | 6.16 |
| XcI (Ω/m) | 10.40 (1.89) | 10.43 (1.53) | 2.03 | 9.66 (2.30) | 9.51 (1.77) | 0.79 |
| XcI-specific (Ω/m) | 52.68 (9.98) | 52.95 (8.31) | 2.27 | 49.10 (12.37) | 48.15 (9.78) | 0.61 |
| Xcp (Ω) | 124553.86 (33426.60) | 118127.36 (30626.33)* | -4.04 | 98627.97 (37206.04) | 88000.08 (32106.78)* | -9.01 |
| XcpI (Ω/m) | 51597.68 (16283.93) | 47234.53 (13479.65)* | -6.78 | 40217.14 (20147.96) | 33548.12 (15912.15)* | -13.46 |
| XcpI-specific  (Ω/m) | 261372.39 (83113.01) | 239069.86 (67934.74)* | -6.46 | 204179.71 (102765.14) | 169595.2 (82223.87)* | -13.56 |
| Cap (pF) | 27.30 (6.95) | 28.70 (7.21)* | 6.00 | 37.28 (14.52) | 41.03 (14.70)* | 12.54 |
| FM (g) | 746.22 (393.57) | 850.22 (408.96)* | 21.33 | 530.76 (358.17) | 627.05 (365.05)* | 28.00 |
| LST (g) | 1703.17 (335.08) | 1661.86 (264.08)* | -1.19 | 2219.65 (779) | 2318.04 (687.27)* | 6.75 |
| BMC (g) | 96.14 (25.73) | 106.80 (23.55)* | 12.89 | 104.24 (42.97) | 121.05 (42.85)* | 18.89 |

| ***Non-dominant arm*** | | | | | | |
| --- | --- | --- | --- | --- | --- | --- |
| PhA (º) | 3.97 (0.73) | 4.19 (0.65)* | 7.11 | 4.49 (0.98) | 4.94 (0.97)* | 11.18 |
| R (Ω) | 355.60 (50.28) | 348.53 (44.81)* | -1.57 | 314.18 (57.63) | 298.19 (53.33)* | -4.65 |
| RI (Ω/m) | 146.93 (28.9) | 139.13 (22.29)* | -4.39 | 125.4 (39.35) | 111.79 (32.18)* | -9.45 |
| RI-specific (Ω/m) | 744.28 (149.77) | 705.25 (116.35)* | -4.06 | 636.94 (203.56) | 565.19 (168.7)* | -9.53 |
| Xc (Ω) | 24.39 (4.41) | 25.23 (3.18)* | 5.34 | 24.0 (3.68) | 25.06 (3.14)* | 5.97 |
| XcI (Ω/m) | 10.05 (2.15) | 10.06 (1.52) | 2.29 | 9.40 (2.15) | 9.25 (1.70) | 0.58 |
| XcI-specific  (Ω/m) | 50.89 (10.99) | 51.06 (8.17) | 2.59 | 47.78 (11.55) | 46.87 (9.5) | 0.42 |
| Xcp (Ω) | 128968.17 (39287.38) | 123476.45 *(32610.92)* | -2.57 | 102018.55 (36857.83) | 91748.41 (33221.58)* | -8.46 |
| XcpI (Ω/m) | 53490.19 (18784.74) | 49355.25 (14218.51)* | -5.29 | 41482.26 (19935.66) | 34911.41 (16360.17)* | -12.96 |
| XcpI-specific  (Ω/m) | 270759.95 (94192.67) | 249761.85 (71529.89)* | -4.96 | 210623.53 (101890.84) | 176391.60 *(84352.24)* | -13.02 |
| Cap (pF) | 26.56 (6.94) | 27.47 (6.86)* | 5.21 | 35.83 (14.08) | 39.34 (14.20)* | 12.24 |
| FM (g) | 775.96 (387.46) | 859.51 (411.44)* | 16.22 | 561.95 (364.73) | 618.24 (360.75)* | 17.63 |
| LST (g) | 1557.8 (295.39) | 1576.89 (257.76)* | 2.21 | 2041.17 (698.84) | 2222.67 (659.57)* | 10.91 |
| BMC (g) | 88.95 (24.29) | 102.16 (22.40)* | 16.97 | 95.15 (38.29) | 114.99 (40.65)* | 23.19 |
| ***Dominant leg*** | | | | | | |
| PhA (º) | 5.39 (0.89) | 5.73 (0.84)* | 7.80 | 5.86 (1.09) | 6.41 (1.07)* | 10.41 |
| R (Ω) | 290.61 (34.24) | 286.14 (32.19)* | -1.27 | 254.74 (35.18) | 247.02 (32.17)* | -2.53 |
| RI (Ω/m) | 119.76 (20.04) | 114.18 (16.54)* | -2.27 | 100.8 (26.24) | 92.03 (21.37)* | -4.92 |
| RI-specific (Ω/m) | 536.79 (89.2) | 516.27 (72.81)* | -3.19 | 438.6 (112.48) | 400.62 (87.85)* | -7.19 |
| Xc (Ω) | 27.22 (4.23) | 28.51 (3.94)* | 6.22 | 25.8 (4.23) | 27.4 (4.05)* | 7.39 |
| XcI (Ω/m) | 11.19 (1.97) | 11.36 (1.78)* | 5.10 | 10.05 (2.13) | 10.08 (1.78) | 4.75 |
| XcI-specific (Ω/m) | 50.29 (9.59) | 51.53 (8.95)* | 4.06 | 43.87 (9.74) | 44.09 (8.32) | 2.25 |
| Xcp (Ω) | 85622.64 (20494.5) | 82911.47 (18840.55)* | -2.01 | 66124.01 (18320.06) | 62051.68 (16397.96)* | -4.20 |
| XcpI (Ω/m) | 35343.36 (9817.82) | 33116.04 (8283.82)* | -4.86 | 26450.36 (10209.5) | 23315.18 (8393.87)* | -8.95 |
| XcpI-specific  (Ω/m) | 158078.34 (42512.12) | 149345.01 (35310.49)* | -3.91 | 114875.14 (43596.33) | 101218.09 (34687.36)* | -8.68 |
| Cap (pF) | 39.26 (9.29) | 40.35 (8.99)* | 4.37 | 51.98 (15.07) | 54.86 (14.69)* | 7.83 |
| FM (g) | 3213.25 (1230.66) | 3627.29 (1243.29)* | 16.54 | 2276.30 (1258.11) | 2583.29 (1256.85)* | 19.05 |
| LST (g) | 5752.99 (1107.14) | 5830.93 (996.75)* | 2.18 | 7187.72 (2158.55) | 7554.72 (1920.81)* | 6.84 |
| BMC (g) | 289.10 (66.34) | 319.06 (60.37)* | 11.63 | 334.33 (116.33) | 378.51 (109.64)* | 15.66 |
| ***Non-dominant leg*** | | | | | | |
| PhA (º) | 5.18 (0.86) | 5.5 (0.81)* | 7.35 | 5.75 (1.06) | 6.26 (1.05)* | 9.81 |
| R (Ω) | 295.12 (36.27) | 289.85 (32.66)* | -1.36 | 256.75 (35.95) | 251.47 (32.91)* | -1.63 |
| RI (Ω/m) | 121.67 (20.57) | 115.67 (16.85)* | -2.37 | 101.72 (27.07) | 93.67 (21.74)* | -4.02 |
| RI-specific (Ω/m) | 545.51 (92.59) | 523 (74.31)* | -3.30 | 442.53 (116.02) | 407.76 (89.43)* | -6.28 |
| Xc (Ω) | 26.49 (3.90) | 27.7 (3.83)* | 5.66 | 25.5 (4.16) | 27.23 (4.02)* | 8.03 |
| XcI (Ω/m) | 10.88 (1.84) | 11.04 (1.72)* | 4.57 | 9.95 (2.17) | 10.02 (1.77) | 5.39 |
| XcI-specific (Ω/m) | 48.92 (8.99) | 50.07 (8.68)* | 3.56 | 43.42 (9.84) | 43.83 (8.35) | 2.90 |
| Xcp (Ω) | 88406.54 (22371.89) | 85075.64 (19339.14)* | -2.08 | 67207.21 (18795.66) | 64316.15 (17022.01)* | -2.64 |
| XcpI (Ω/m) | 36497.55 (10404.14) | 33986.31 (8535.61)* | -4.94 | 26949.28 (10620.86) | 24158.77 (8686.79)* | -7.39 |
| XcpI-specific  (Ω/m) | 163340.38 (45629.27) | 153277.74 (36515.04)* | -4.00 | 117008.88 (45380.63) | 104873.56 (35927.70)* | -7.11 |
| Cap (pF) | 38.15 (9.03) | 39.34 (8.90)* | 4.90 | 51.26 (14.92) | 52.97 (14.23)* | 5.22 |
| FM (g) | 3308.72 (1247.59) | 3585.04 (1233.23)* | 11.79 | 2369.98 (1297.53) | 2569.26 (1242.35)* | 13.81 |
| LST (g) | 5716.13 (1103.00) | 5724.51 (985.35) | 0.95 | 7140.1 (2134.62) | 7409.76 (1861.95)* | 5.58 |
| BMC (g) | 294.35 (66.55) | 316.41 (58.43)* | 8.78 | 345.11 (121.62) | 381.81 (112.32)* | 13.08 |
| Abbreviations: BMC, bone mineral content; BMI, body mass index; Cap, capacitance; FM, fat mass; LST, lean soft tissue; PhA, phase angle; R, resistance in series; RI, resistance in series normalized to stature; RI-specific, resistance in series normalized to segment length; SD, standard deviation; Xc, capacitive reactance in series; XcI, capacitive reactance in series normalized to stature; XcI-specific, capacitive reactance in series normalized to segment length; Xcp, capacitive reactance in parallel; XcpI, capacitive reactance in parallel normalized to stature; XcpI-specific, capacitive reactance in parallel normalized to segment length.  * Significant difference between moments at 95% level.  # BMI-for-age and stature-for-age z-scores were calculated based on the WHO growth reference for children and adolescents aged 5-19 years. | | | | | | |
