# Supplementary material
Source: Research Square preprint supplement (doi:10.21203/rs.3.rs-9224431/v1)
Supplement: Supplementary file 5 [file dc3abc0d6801e0f40b2b361d.docx]

**Supplementary Table 8.** Comparison of the explained variance of regional resistance normalized to stature versus regional resistance normalized to segment length in relation to regional body components in both prospective analyses (adjusted models; relative to baseline peak height velocity momentum).

|  | | Prospective analysis (n=562) | | | |
| --- | --- | --- | --- | --- | --- |
| Pre-PHV | | Post-PHV | |
| Δ RI | Δ RI-specific | Δ RI | Δ RI-specific |
| M2 (R2Part) | M2 (R2Part) | M2 (R2Part) | M2 (R2Part) |
| ***Females*** *(n=290)* | | | | | |
| LST | *Dominant Arm* | 4.78 | 2.95 | 23.72 | 23.54 |
| *Non-dominant Arm* | 5.42 | - | 18.22 | 22.33 |
| *Dominant Leg* | 6.92 | 7.40 | 4.48 | 6.04 |
| *Non-dominant Leg* | **-** | **-** | **6.87** | **10.88** |
| FM | *Dominant Arm* | - | - | - | - |
| *Non-dominant Arm* | - | - | - | - |
| *Dominant Leg* | - | - | - | - |
| *Non-dominant Leg* | - | - | - | - |
| BMC | *Dominant Arm* | 3.77 | 5.88 | 4.98 | 6.77 |
| *Non-dominant Arm* | 5.59 | 6.57 | 3.42 | 5.13 |
| *Dominant Leg* | 10.18 | 12.22 | **-** | **-** |
| *Non-dominant Leg* | - | 4.48 | 1.06 | 3.32 |
| ***Males*** *(n=272)* | | | | | |
| LST | *Dominant Arm* | 54.35 | 53.77 | 9.24 | 14.32 |
| *Non-dominant Arm* | 50.12 | 47.98 | 19.19 | 19.08 |
| *Dominant Leg* | **42.78** | **37.88** | **6.88** | **10.63** |
| *Non-dominant Leg* | **36.53** | **32.10** | **11.33** | **15.24** |
| FM | *Dominant Arm* | - | - | 2.29 | 2.90 |
| *Non-dominant Arm* | - | - | - | 3.05 |
| *Dominant Leg* | - | - | - | - |
| *Non-dominant Leg* | - | - | - | - |
| BMC | *Dominant Arm* | 23.74 | 22.30 | 2.27 | 2.44 |
| *Non-dominant Arm* | 29.67 | 28.65 | 4.16 | 4.03 |
| *Dominant Leg* | 22.60 | 21.15 | **3.43** | **5.46** |
| *Non-dominant Leg* | 19.88 | 19.20 | **2.64** | **6.07** |
| Bolded coefficients represent differences between RI and RI-specific at the 95% confidence level (p<0.05), according to Z-Steiger’s Z test.  Dashes (“-“) represent no significant associations between regional RI or RI-specific and regional body composition.  Prospective models: adjusted for ethnicity, presence of chronic diseases, body mass index, age at baseline, each raw bioelectrical impedance variable at baseline, and each body component at baseline.  Abbreviations: BMC, bone mineral content; FM, fat mass; LST, lean soft tissue; PHV.peak height velocity; RI, resistance index (normalized to height); RI-specific, resistance index (normalized to segment length). | | | | | |
