# Supplementary material
Source: Research Square preprint supplement (doi:10.21203/rs.3.rs-9224431/v1)
Supplement: Supplementary file 6 [file eada9e436f1298775928a9c5.docx]

**Supplementary Table 4.** Sex-stratified linear regression models exploring the cross-sectional unadjusted association between regional raw bioelectrical impedance analysis variables and regional DXA-derived body components (by limb and dominance; *n=613*).

|  | | **Lean Soft Tissue** | | | |  | **Fat Mass** | | | |  | **Bone Mineral Content** | | | |
| --- | --- | --- | --- | --- | --- | --- | --- | --- | --- | --- | --- | --- | --- | --- | --- |
| Arm | | Leg | |  | Arm | | Leg | |  | Arm | | Leg | |
| *Dom* | *Non Dom* | *Dom* | *Non Dom* |  | *Dom* | *Non Dom* | *Dom* | *Non Dom* |  | *Dom* | *Non Dom* | *Dom* | *Non Dom* |
| ***Females*** *(n=313)* | | | | | | | | | | | | | | | |
| PhA | β | 251.366 | 208.506 | 654.551 | 629.261 |  | 45.913 | 49.794 | 361.418 | 315.412 |  | 16.355 | 15.547 | 32.051 | 33.107 |
| R2 | 29.51 | 25.78 | 26.83 | 23.02 |  | 0.69 | 0.83 | 6.68 | 4.56 |  | 21.27 | 21.01 | 18.38 | 17.73 |
| *p-value* | <0.001 | <0.001 | <0.001 | <0.001 |  | 0.172 | 0.135 | <0.001 | <0.001 |  | <0.001 | <0.001 | <0.001 | <0.001 |
| BH-FDR | 0.038 | 0.038 | 0.031 | 0.038 |  | 0.050 | 0.050 | 0.038 | 0.044 |  | 0.038 | 0.038 | 0.031 | 0.031 |
| RI | β | -10.041 | -8.018 | -43.684 | -42.044 |  | -5.327 | -5.200 | -24.689 | -25.128 |  | -0.719 | -0.617 | -2.261 | -2.207 |
| R2 | 70.59 | 66.58 | 67.03 | 65.18 |  | 13.95 | 15.81 | 17.49 | 18.35 |  | 61.60 | 57.88 | 50.88 | 49.97 |
| *p-value* | <0.001 | <0.001 | <0.001 | <0.001 |  | <0.001 | <0.001 | <0.001 | <0.001 |  | <0.001 | <0.001 | <0.001 | <0.001 |
| BH-FDR | 0.013 | 0.013 | 0.006 | 0.006 |  | 0.025 | 0.019 | 0.006 | 0.006 |  | 0.013 | 0.013 | 0.006 | 0.006 |
| RI-specific | β | -1.952 | -1.599 | -9.353 | -8.792 |  | -1.050 | -1.044 | -4.439 | -4.397 |  | -0.140 | -0.123 | -0.501 | -0.475 |
| R2 | 73.20 | 70.33 | 59.93 | 56.86 |  | 14.86 | 16.93 | 11.03 | 11.21 |  | 63.98 | 61.07 | 48.81 | 46.10 |
| *p-value* | <0.001 | <0.001 | <0.001 | <0.001 |  | <0.001 | <0.001 | <0.001 | <0.001 |  | <0.001 | <0.001 | <0.001 | <0.001 |
| BH-FDR | 0.006 | 0.006 | 0.013 | 0.013 |  | 0.013 | 0.006 | 0.025 | 0.025 |  | 0.006 | 0.006 | 0.013 | 0.013 |
| XcI | β | -65.298 | -45.724 | -184.729 | -215.667 |  | -59.556 | -49.510 | -118.267 | -143.903 |  | -5.121 | -3.669 | -10.012 | -11.237 |
| R2 | 13.99 | 11.51 | 11.16 | 13.07 |  | 8.17 | 7.62 | 3.73 | 4.59 |  | 14.64 | 10.87 | 9.37 | 9.87 |
| *p-value* | <0.001 | <0.001 | <0.001 | <0.001 |  | <0.001 | <0.001 | 0.001 | <0.001 |  | <0.001 | <0.001 | <0.001 | <0.001 |
| BH-FDR | 0.050 | 0.050 | 0.044 | 0.044 |  | 0.044 | 0.044 | 0.044 | 0.038 |  | 0.050 | 0.050 | 0.044 | 0.044 |
| XcI-specific | β | -13.531 | -9.770 | -29.690 | -34.869 |  | -11.876 | -10.193 | -11.892 | -14.992 |  | -1.050 | -0.779 | -1.779 | -1.954 |
| R2 | 16.64 | 13.72 | 6.73 | 8.09 |  | 9.00 | 8.43 | 0.88 | 1.18 |  | 17.05 | 12.78 | 6.90 | 7.06 |
| *p-value* | <0.001 | <0.001 | <0.001 | <0.001 |  | <0.001 | <0.001 | 0.123 | 0.074 |  | <0.001 | <0.001 | <0.001 | <0.001 |
| BH-FDR | 0.044 | 0.044 | 0.050 | 0.050 |  | 0.038 | 0.038 | 0.050 | 0.050 |  | 0.044 | 0.044 | 0.050 | 0.050 |
| XcpI | β | -0.015 | -0.011 | -0.079 | -0.072 |  | -0.009 | -0.008 | -0.047 | -0.045 |  | -0.001 | -0.001 | -0.004 | -0.004 |
| R2 | 59.95 | 51.08 | 51.77 | 48.04 |  | 14.08 | 14.84 | 14.77 | 15.03 |  | 48.16 | 41.01 | 34.74 | 31.95 |
| *p-value* | <0.001 | <0.001 | <0.001 | <0.001 |  | <0.001 | <0.001 | <0.001 | <0.001 |  | <0.001 | <0.001 | <0.001 | <0.001 |
| BH-FDR | 0.025 | 0.025 | 0.019 | 0.019 |  | 0.019 | 0.025 | 0.013 | 0.013 |  | 0.025 | 0.025 | 0.025 | 0.019 |
| XcpI-specific | β | -0.003 | -0.002 | -0.018 | -0.016 |  | -0.002 | -0.002 | -0.010 | -0.009 |  | 0.000 | 0.000 | -0.001 | -0.001 |
| R2 | 62.98 | 55.24 | 50.35 | 45.35 |  | 14.91 | 15.90 | 11.84 | 11.62 |  | 50.85 | 44.44 | 35.23 | 31.14 |
| *p-value* | <0.001 | <0.001 | <0.001 | <0.001 |  | <0.001 | <0.001 | <0.001 | <0.001 |  | <0.001 | <0.001 | <0.001 | <0.001 |
| BH-FDR | 0.019 | 0.019 | 0.025 | 0.025 |  | 0.006 | 0.013 | 0.019 | 0.019 |  | 0.019 | 0.019 | 0.019 | 0.025 |
| Cap | β | 31.844 | 28.561 | 61.884 | 62.979 |  | 19.371 | 20.638 | 43.063 | 43.916 |  | 2.000 | 1.963 | 2.446 | 2.552 |
| R2 | 44.28 | 45.73 | 26.47 | 26.05 |  | 11.50 | 13.48 | 10.47 | 9.98 |  | 29.74 | 31.67 | 11.72 | 11.90 |
| *p-value* | <0.001 | <0.001 | <0.001 | <0.001 |  | <0.001 | <0.001 | <0.001 | <0.001 |  | <0.001 | <0.001 | <0.001 | <0.001 |
| BH-FDR | 0.031 | 0.031 | 0.038 | 0.031 |  | 0.031 | 0.031 | 0.031 | 0.031 |  | 0.031 | 0.031 | 0.038 | 0.038 |
| ***Males*** *(n=300)* | | | | | | | | | | | | | | | |
| PhA | β | 561.773 | 515.610 | 1220.793 | 1182.216 |  | -38.096 | -32.329 | -114.146 | -89.563 |  | 30.684 | 28.213 | 66.432 | 67.282 |
| R2 | 52.70 | 51.86 | 39.73 | 36.83 |  | 1.16 | 0.76 | 1.06 | 0.58 |  | 52.55 | 52.53 | 40.00 | 36.43 |
| *p-value* | <0.001 | <0.001 | <0.001 | <0.001 |  | 0.083 | 0.159 | 0.096 | 0.219 |  | <0.001 | <0.001 | <0.001 | <0.001 |
| BH-FDR | 0.038 | 0.038 | 0.038 | 0.038 |  | 0.019 | 0.025 | 0.019 | 0.025 |  | 0.038 | 0.038 | 0.031 | 0.031 |
| RI | β | -17.223 | -15.690 | -70.510 | -69.092 |  | -0.104 | -0.296 | -0.743 | -2.307 |  | -0.891 | -0.802 | -3.489 | -3.567 |
| R2 | 83.56 | 84.29 | 82.33 | 84.08 |  | 0.01 | 0.11 | 0.03 | 0.26 |  | 74.73 | 74.53 | 68.53 | 68.44 |
| *p-value* | <0.001 | <0.001 | <0.001 | <0.001 |  | 0.846 | 0.590 | 0.788 | 0.413 |  | <0.001 | <0.001 | <0.001 | <0.001 |
| BH-FDR | 0.013 | 0.013 | 0.006 | 0.006 |  | 0.050 | 0.050 | 0.044 | 0.044 |  | 0.013 | 0.013 | 0.006 | 0.006 |
| RI-specific | β | -3.341 | -3.039 | -16.134 | -15.726 |  | -0.077 | -0.114 | -0.126 | -0.524 |  | -0.174 | -0.156 | -0.800 | -0.814 |
| R2 | 84.10 | 84.86 | 79.94 | 81.21 |  | 0.21 | 0.45 | 0.01 | 0.25 |  | 75.92 | 75.65 | 66.86 | 66.47 |
| *p-value* | <0.001 | <0.001 | <0.001 | <0.001 |  | 0.460 | 0.282 | 0.844 | 0.422 |  | <0.001 | <0.001 | <0.001 | <0.001 |
| BH-FDR | 0.006 | 0.006 | 0.013 | 0.013 |  | 0.038 | 0.038 | 0.050 | 0.050 |  | 0.006 | 0.006 | 0.013 | 0.013 |
| XcI | β | -202.291 | -192.747 | -528.925 | -525.128 |  | -16.221 | -19.198 | -68.355 | -74.186 |  | -10.048 | -9.341 | -24.264 | -25.201 |
| R2 | 40.65 | 39.93 | 33.74 | 35.33 |  | 1.25 | 1.49 | 1.72 | 1.94 |  | 33.52 | 31.73 | 24.14 | 24.85 |
| *p-value* | <0.001 | <0.001 | <0.001 | <0.001 |  | 0.072 | 0.049 | 0.034 | 0.024 |  | <0.001 | <0.001 | <0.001 | <0.001 |
| BH-FDR | 0.044 | 0.050 | 0.044 | 0.044 |  | 0.013 | 0.013 | 0.006 | 0.013 |  | 0.050 | 0.050 | 0.044 | 0.044 |
| XcI-specific | β | -37.709 | -36.112 | -107.818 | -107.828 |  | -3.968 | -4.593 | -13.419 | -15.201 |  | -1.895 | -1.772 | -4.939 | -5.184 |
| R2 | 40.46 | 40.08 | 28.38 | 30.05 |  | 2.14 | 2.43 | 1.34 | 1.64 |  | 34.17 | 32.63 | 20.25 | 21.21 |
| *p-value* | <0.001 | <0.001 | <0.001 | <0.001 |  | 0.018 | 0.012 | 0.061 | 0.038 |  | <0.001 | <0.001 | <0.001 | <0.001 |
| BH-FDR | 0.050 | 0.044 | 0.050 | 0.050 |  | 0.006 | 0.006 | 0.013 | 0.019 |  | 0.044 | 0.044 | 0.050 | 0.050 |
| XcpI | β | -0.032 | -0.029 | -0.168 | -0.164 |  | 0.000 | -0.001 | -0.003 | -0.008 |  | -0.002 | -0.001 | -0.008 | -0.008 |
| R2 | 75.60 | 76.20 | 70.25 | 72.99 |  | 0.08 | 0.26 | 0.06 | 0.47 |  | 66.50 | 66.26 | 55.73 | 56.99 |
| *p-value* | <0.001 | <0.001 | <0.001 | <0.001 |  | 0.657 | 0.410 | 0.683 | 0.269 |  | <0.001 | <0.001 | <0.001 | <0.001 |
| BH-FDR | 0.031 | 0.025 | 0.025 | 0.019 |  | 0.044 | 0.044 | 0.031 | 0.038 |  | 0.031 | 0.025 | 0.025 | 0.019 |
| XcpI-specific | β | -0.006 | -0.006 | -0.039 | -0.038 |  | 0.000 | 0.000 | -0.001 | -0.002 |  | 0.000 | 0.000 | -0.002 | -0.002 |
| R2 | 76.91 | 77.59 | 70.31 | 72.66 |  | 0.25 | 0.54 | 0.06 | 0.49 |  | 68.01 | 67.79 | 56.00 | 56.94 |
| *p-value* | <0.001 | <0.001 | <0.001 | <0.001 |  | 0.423 | 0.236 | 0.698 | 0.259 |  | <0.001 | <0.001 | <0.001 | <0.001 |
| BH-FDR | 0.019 | 0.019 | 0.019 | 0.025 |  | 0.031 | 0.031 | 0.038 | 0.031 |  | 0.019 | 0.019 | 0.019 | 0.025 |
| Cap | β | 48.333 | 44.916 | 92.899 | 100.207 |  | 2.266 | 3.124 | 7.151 | 13.618 |  | 2.487 | 2.286 | 4.315 | 4.864 |
| R2 | 75.63 | 73.59 | 43.38 | 48.70 |  | 0.79 | 1.34 | 0.78 | 2.47 |  | 66.91 | 64.51 | 31.82 | 35.04 |
| *p-value* | <0.001 | <0.001 | <0.001 | <0.001 |  | 0.151 | 0.062 | 0.153 | 0.011 |  | <0.001 | <0.001 | <0.001 | <0.001 |
| BH-FDR | 0.025 | 0.031 | 0.031 | 0.031 |  | 0.025 | 0.019 | 0.025 | 0.006 |  | 0.025 | 0.031 | 0.038 | 0.038 |
|  | | | | | | | | | | | | | | | |
| Models: M1, unadjusted model.  Abbreviations: β, unstandardized regression coefficient; BH-FDR, Benjamini–Hochberg False Discovery Rate; Cap, capacitance; Dom, dominant side; Non-Dom, non-dominant side; PhA, phase angle; R2, coefficient of determination; RI, resistance index (normalized to height); RI-specific, resistance index (normalized to segment length); XcI, capacitive reactance index (normalized to height); XcI-specific, capacitive reactance index (normalized to segment length); XcpI, parallel-transformed capacitive reactance index (normalized to height); XcpI-specific, parallel-transformed capacitive reactance index (normalized to segment length) | | | | | | | | | | | | | | | |

**Supplementary Table 5.** Sex-stratified linear regression models exploring the cross-sectional adjusted association between regional raw bioelectrical impedance analysis variables and regional DXA-derived body components (by limb and dominance; *n=613*).

|  | | **Lean Soft Tissue** | | | |  | **Fat Mass** | | | |  | **Bone Mineral Content** | | | |
| --- | --- | --- | --- | --- | --- | --- | --- | --- | --- | --- | --- | --- | --- | --- | --- |
| Arm | | Leg | |  | Arm | | Leg | |  | Arm | | Leg | |
| *Dom* | *Non Dom* | *Dom* | *Non Dom* |  | *Dom* | *Non Dom* | *Dom* | *Non Dom* |  | *Dom* | *Non Dom* | *Dom* | *Non Dom* |
| ***Females*** *(n=313)* | | | | | | | | | | | | | | | |
| PhA | *β* | 0.442 | 0.418 | 0.283 | 0.284 |  | -0.214 | -0.189 | -0.193 | -0.150 |  | 0.310 | 0.320 | 0.241 | 0.265 |
| R2Part | 16.68 | 15.28 | 6.15 | 6.80 |  | 3.91 | 3.11 | 2.86 | 1.90 |  | 8.21 | 8.92 | 4.46 | 5.91 |
| *p-value* | <0.001 | <0.001 | <0.001 | <0.001 |  | <0.001 | <0.001 | <0.001 | <0.001 |  | <0.001 | <0.001 | <0.001 | <0.001 |
| BH-FDR | 0.038 | 0.038 | 0.044 | 0.050 |  | 0.006 | 0.013 | 0.006 | 0.006 |  | 0.031 | 0.031 | 0.044 | 0.038 |
| AIC | 3769.4 | 3717.9 | 4391.4 | 4395.0 |  | 3576.3 | 3542.2 | 4180.2 | 4191.7 |  | 2359.8 | 2328.9 | 2925.3 | 2925.4 |
| RI | *β* | -0.794 | -0.805 | -0.661 | -0.651 |  | 0.162 | 0.142 | 0.054 | 0.035 |  | -0.632 | -0.614 | -0.580 | -0.571 |
| R2Part | 42.45 | 41.02 | 30.39 | 30.31 |  | 1.76 | 1.28 | 0.20 | 0.09 |  | 26.86 | 23.85 | 23.38 | 23.33 |
| *p-value* | <0.001 | <0.001 | <0.001 | <0.001 |  | <0.001 | <0.001 | 0.109 | 0.279 |  | <0.001 | <0.001 | <0.001 | <0.001 |
| BH-FDR | 0.013 | 0.013 | 0.013 | 0.006 |  | 0.031 | 0.038 | 0.044 | 0.044 |  | 0.013 | 0.013 | 0.013 | 0.013 |
| AIC | 3590.2 | 3552.8 | 4183.9 | 4214.7 |  | 3606.5 | 3570.5 | 4203.2 | 4217.7 |  | 2233.1 | 2230.7 | 2815.1 | 2831.3 |
| RI-specific | *β* | -0.822 | -0.832 | -0.611 | -0.598 |  | 0.163 | 0.148 | 0.009 | -0.002 |  | -0.659 | -0.637 | -0.562 | -0.544 |
| R2Part | 44.56 | 43.57 | 30.80 | 30.11 |  | 1.74 | 1.38 | 0.01 | 0.00 |  | 28.62 | 25.54 | 26.07 | 24.92 |
| *p-value* | <0.001 | <0.001 | <0.001 | <0.001 |  | <0.001 | <0.001 | 0.779 | 0.946 |  | <0.001 | <0.001 | <0.001 | <0.001 |
| BH-FDR | 0.006 | 0.006 | 0.006 | 0.013 |  | 0.038 | 0.031 | 0.050 | 0.050 |  | 0.006 | 0.006 | 0.006 | 0.006 |
| AIC | 3568.5 | 3529.3 | 4179.2 | 4216.9 |  | 3606.6 | 3569.0 | 4205.8 | 4218.9 |  | 2217.4 | 2217.0 | 2797.2 | 2820.9 |
| XcI | *β* | -0.254 | -0.209 | -0.261 | -0.268 |  | -0.056 | -0.059 | -0.109 | -0.100 |  | -0.234 | -0.162 | -0.230 | -0.221 |
| R2Part | 5.63 | 3.72 | 6.58 | 6.90 |  | 0.27 | 0.30 | 1.14 | 0.96 |  | 4.79 | 2.25 | 5.08 | 4.69 |
| *p-value* | <0.001 | <0.001 | <0.001 | <0.001 |  | 0.072 | 0.047 | <0.001 | <0.001 |  | <0.001 | 0.001 | <0.001 | <0.001 |
| BH-FDR | 0.050 | 0.050 | 0.038 | 0.038 |  | 0.044 | 0.044 | 0.025 | 0.025 |  | 0.050 | 0.050 | 0.038 | 0.044 |
| AIC | 3820.6 | 3768.5 | 4388.9 | 4394.4 |  | 3625.4 | 3584.5 | 4205.2 | 4205.4 |  | 2377.8 | 2363.4 | 2922.6 | 2930.9 |
| XcI-specific | *β* | -0.287 | -0.233 | -0.275 | -0.278 |  | -0.051 | -0.051 | -0.127 | -0.115 |  | -0.263 | -0.182 | -0.261 | -0.247 |
| R2Part | 6.93 | 4.63 | 7.36 | 7.59 |  | 0.22 | 0.23 | 1.57 | 1.31 |  | 5.84 | 2.82 | 6.65 | 6.01 |
| *p-value* | <0.001 | <0.001 | <0.001 | <0.001 |  | 0.107 | 0.083 | <0.001 | <0.001 |  | <0.001 | <0.001 | <0.001 | <0.001 |
| BH-FDR | 0.044 | 0.044 | 0.031 | 0.031 |  | 0.050 | 0.050 | 0.019 | 0.019 |  | 0.044 | 0.044 | 0.031 | 0.031 |
| AIC | 3815.0 | 3764.8 | 4384.4 | 4390.5 |  | 3626.1 | 3585.5 | 4199.1 | 4200.5 |  | 2372.4 | 2360.6 | 2915.4 | 2924.9 |
| XcpI | *β* | -0.713 | -0.672 | -0.536 | -0.513 |  | 0.193 | 0.163 | 0.109 | 0.088 |  | -0.514 | -0.451 | -0.421 | -0.398 |
| R2Part | 33.46 | 28.18 | 19.79 | 18.83 |  | 2.45 | 1.65 | 0.82 | 0.55 |  | 17.37 | 12.72 | 12.23 | 11.35 |
| *p-value* | <0.001 | <0.001 | <0.001 | <0.001 |  | <0.001 | <0.001 | 0.001 | 0.007 |  | <0.001 | <0.001 | <0.001 | <0.001 |
| BH-FDR | 0.025 | 0.025 | 0.025 | 0.025 |  | 0.025 | 0.025 | 0.031 | 0.031 |  | 0.025 | 0.025 | 0.025 | 0.025 |
| AIC | 3666.8 | 3647.6 | 4284.2 | 4317.5 |  | 3597.2 | 3564.9 | 4195.0 | 4211.2 |  | 2304.9 | 2307.1 | 2878.7 | 2899.3 |
| XcpI-specific | *β* | -0.747 | -0.710 | -0.533 | -0.504 |  | 0.197 | 0.172 | 0.076 | 0.060 |  | -0.544 | -0.482 | -0.438 | -0.406 |
| R2Part | 35.89 | 31.12 | 21.53 | 19.98 |  | 2.50 | 1.82 | 0.44 | 0.28 |  | 19.02 | 14.34 | 14.57 | 12.97 |
| *p-value* | <0.001 | <0.001 | <0.001 | <0.001 |  | <0.001 | <0.001 | 0.018 | 0.054 |  | <0.001 | <0.001 | <0.001 | <0.001 |
| BH-FDR | 0.019 | 0.019 | 0.019 | 0.019 |  | 0.019 | 0.019 | 0.038 | 0.038 |  | 0.019 | 0.019 | 0.019 | 0.019 |
| AIC | 3648.2 | 3628.6 | 4270.1 | 4308.8 |  | 3596.4 | 3562.4 | 4200.1 | 4215.0 |  | 2293.7 | 2297.2 | 2866.5 | 2891.0 |
| Cap | *β* | 0.564 | 0.602 | 0.287 | 0.308 |  | -0.223 | -0.221 | -0.168 | -0.149 |  | 0.327 | 0.332 | 0.116 | 0.143 |
| R2Part | 21.78 | 23.44 | 5.78 | 6.89 |  | 3.42 | 3.15 | 1.97 | 1.60 |  | 7.30 | 7.12 | 0.94 | 1.50 |
| *p-value* | <0.001 | <0.001 | <0.001 | <0.001 |  | <0.001 | <0.001 | <0.001 | <0.001 |  | <0.001 | <0.001 | 0.052 | 0.014 |
| BH-FDR | 0.031 | 0.031 | 0.050 | 0.044 |  | 0.013 | 0.006 | 0.013 | 0.013 |  | 0.038 | 0.038 | 0.050 | 0.050 |
| AIC | 3742.1 | 3675.6 | 4376.9 | 4394.5 |  | 3583.5 | 3541.5 | 4179.1 | 4196.1 |  | 2364.7 | 2338.6 | 2930.7 | 2944.8 |
| ***Males*** *(n=300)* | | | | | | | | | | | | | | | |
| PhA | *β* | 0.602 | 0.595 | 0.471 | 0.447 |  | -0.419 | -0.401 | -0.432 | -0.409 |  | 0.585 | 0.576 | 0.497 | 0.462 |
| R2Part | 28.99 | 27.86 | 18.11 | 16.44 |  | 14.02 | 12.67 | 15.25 | 13.81 |  | 27.34 | 26.16 | 20.17 | 17.60 |
| *p-value* | <0.001 | <0.001 | <0.001 | <0.001 |  | <0.001 | <0.001 | <0.001 | <0.001 |  | <0.001 | <0.001 | <0.001 | <0.001 |
| BH-FDR | 0.038 | 0.038 | 0.044 | 0.050 |  | 0.038 | 0.038 | 0.006 | 0.006 |  | 0.038 | 0.038 | 0.031 | 0.031 |
| AIC | 3952.4 | 3912.7 | 4556.4 | 4572.8 |  | 3422.2 | 3414.8 | 4094.7 | 4110.2 |  | 2418.1 | 2362.6 | 3047.9 | 3090.2 |
| RI | *β* | -0.849 | -0.864 | -0.811 | -0.844 |  | 0.490 | 0.470 | 0.404 | 0.406 |  | -0.756 | -0.749 | -0.744 | -0.758 |
| R2Part | 51.32 | 52.54 | 50.22 | 52.72 |  | 17.12 | 15.52 | 12.46 | 12.17 |  | 40.71 | 39.52 | 42.18 | 42.46 |
| *p-value* | <0.001 | <0.001 | <0.001 | <0.001 |  | <0.001 | <0.001 | <0.001 | <0.001 |  | <0.001 | <0.001 | <0.001 | <0.001 |
| BH-FDR | 0.013 | 0.013 | 0.006 | 0.006 |  | 0.013 | 0.013 | 0.013 | 0.013 |  | 0.013 | 0.013 | 0.006 | 0.006 |
| AIC | 3714.1 | 3655.5 | 4248.4 | 4237.8 |  | 3385.0 | 3378.4 | 4123.2 | 4127.8 |  | 2292.1 | 2237.6 | 2895.4 | 2926.6 |
| RI-specific | *β* | -0.863 | -0.879 | -0.789 | -0.811 |  | 0.486 | 0.465 | 0.353 | 0.346 |  | -0.772 | -0.764 | -0.726 | -0.731 |
| R2Part | 51.51 | 52.91 | 49.72 | 51.35 |  | 16.32 | 14.81 | 9.95 | 9.35 |  | 41.16 | 39.96 | 42.04 | 41.67 |
| *p-value* | <0.001 | <0.001 | <0.001 | <0.001 |  | <0.001 | <0.001 | <0.001 | <0.001 |  | <0.001 | <0.001 | <0.001 | <0.001 |
| BH-FDR | 0.006 | 0.006 | 0.013 | 0.013 |  | 0.031 | 0.031 | 0.038 | 0.038 |  | 0.006 | 0.006 | 0.013 | 0.013 |
| AIC | 3710.9 | 3648.9 | 4257.2 | 4262.2 |  | 3395.1 | 3388.0 | 4146.4 | 4155.5 |  | 2286.6 | 2232.3 | 2896.8 | 2933.8 |
| XcI | *β* | -0.498 | -0.499 | -0.457 | -0.472 |  | 0.228 | 0.205 | 0.081 | 0.085 |  | -0.413 | -0.396 | -0.381 | -0.387 |
| R2Part | 20.71 | 21.15 | 19.23 | 20.36 |  | 4.32 | 3.56 | 0.61 | 0.66 |  | 14.26 | 13.30 | 13.35 | 13.65 |
| *p-value* | <0.001 | <0.001 | <0.001 | <0.001 |  | <0.001 | <0.001 | 0.047 | 0.034 |  | <0.001 | <0.001 | <0.001 | <0.001 |
| BH-FDR | 0.044 | 0.044 | 0.031 | 0.038 |  | 0.044 | 0.044 | 0.044 | 0.044 |  | 0.044 | 0.044 | 0.044 | 0.044 |
| AIC | 4004.7 | 3953.7 | 4550.0 | 4551.5 |  | 3512.8 | 3505.4 | 4218.2 | 4226.2 |  | 2501.2 | 2444.1 | 3081.5 | 3108.8 |
| XcI-specific | *β* | -0.494 | -0.499 | -0.433 | -0.447 |  | 0.216 | 0.195 | 0.042 | 0.042 |  | -0.415 | -0.400 | -0.363 | -0.369 |
| R2Part | 19.95 | 20.67 | 17.87 | 18.87 |  | 3.80 | 3.15 | 0.17 | 0.17 |  | 14.05 | 13.25 | 12.54 | 12.87 |
| *p-value* | <0.001 | <0.001 | <0.001 | <0.001 |  | <0.001 | <0.001 | 0.303 | 0.285 |  | <0.001 | <0.001 | <0.001 | <0.001 |
| BH-FDR | 0.050 | 0.050 | 0.050 | 0.044 |  | 0.050 | 0.050 | 0.050 | 0.050 |  | 0.050 | 0.050 | 0.050 | 0.050 |
| AIC | 4009.0 | 3956.5 | 4557.8 | 4559.8 |  | 3516.9 | 3508.9 | 4221.2 | 4229.6 |  | 2502.3 | 2444.4 | 3085.3 | 3112.4 |
| XcpI | *β* | -0.792 | -0.809 | -0.722 | -0.765 |  | 0.492 | 0.473 | 0.400 | 0.405 |  | -0.692 | -0.686 | -0.642 | -0.668 |
| R2Part | 44.04 | 45.11 | 40.15 | 43.03 |  | 17.02 | 15.41 | 12.30 | 12.06 |  | 33.57 | 32.39 | 31.71 | 32.82 |
| *p-value* | <0.001 | <0.001 | <0.001 | <0.001 |  | <0.001 | <0.001 | <0.001 | <0.001 |  | <0.001 | <0.001 | <0.001 | <0.001 |
| BH-FDR | 0.025 | 0.025 | 0.025 | 0.025 |  | 0.019 | 0.019 | 0.019 | 0.019 |  | 0.025 | 0.025 | 0.025 | 0.025 |
| AIC | 3817.6 | 3762.3 | 4387.7 | 4375.7 |  | 3386.3 | 3379.9 | 4124.7 | 4128.9 |  | 2366.8 | 2311.6 | 2979.0 | 3002.6 |
| XcpI-specific | *β* | -0.809 | -0.828 | -0.721 | -0.757 |  | 0.494 | 0.475 | 0.372 | 0.370 |  | -0.708 | -0.702 | -0.643 | -0.663 |
| R2Part | 44.90 | 46.16 | 41.03 | 43.38 |  | 16.74 | 15.18 | 10.89 | 10.39 |  | 34.35 | 33.19 | 32.64 | 33.30 |
| *p-value* | <0.001 | <0.001 | <0.001 | <0.001 |  | <0.001 | <0.001 | <0.001 | <0.001 |  | <0.001 | <0.001 | <0.001 | <0.001 |
| BH-FDR | 0.019 | 0.019 | 0.019 | 0.019 |  | 0.025 | 0.025 | 0.025 | 0.025 |  | 0.019 | 0.019 | 0.019 | 0.019 |
| AIC | 3807.3 | 3749.7 | 4378.1 | 4371.8 |  | 3389.9 | 3383.0 | 4137.9 | 4145.7 |  | 2359.6 | 2304.4 | 2972.6 | 2999.2 |
| Cap | *β* | 0.838 | 0.835 | 0.507 | 0.573 |  | -0.583 | -0.545 | -0.368 | -0.390 |  | 0.721 | 0.695 | 0.423 | 0.463 |
| R2Part | 43.24 | 42.74 | 19.22 | 22.34 |  | 20.90 | 18.21 | 10.12 | 10.37 |  | 32.03 | 29.62 | 13.41 | 14.62 |
| *p-value* | <0.001 | <0.001 | <0.001 | <0.001 |  | <0.001 | <0.001 | <0.001 | <0.001 |  | <0.001 | <0.001 | <0.001 | <0.001 |
| BH-FDR | 0.031 | 0.031 | 0.038 | 0.031 |  | 0.006 | 0.006 | 0.031 | 0.031 |  | 0.031 | 0.031 | 0.038 | 0.038 |
| AIC | 3826.8 | 3788.9 | 4550.1 | 4540.1 |  | 3331.1 | 3338.7 | 4144.8 | 4145.9 |  | 2380.5 | 2335.6 | 3081.3 | 3104.4 |
| Models: M2, model adjusted for ethnicity, chronic diseases, salivary osmolality, body mass index, fasting time, body temperature + menstruation condition (females).  Abbreviations: AIC, Akaike Information Criterion; BH-FDR, *β*, standardized regression coefficient; Benjamini-Hochberg False Discovery Rate; Cap, capacitance; Dom, dominant side; Non-Dom, non-dominant side; PhA, phase angle; R2Part, semi-partial coefficient of determination; RI, resistance index (normalized to height); RI-specific, resistance index (normalized to segment length); XcI, capacitive reactance index (normalized to height); XcI-specific, capacitive reactance index (normalized to segment length); XcpI, parallel-transformed capacitive reactance index (normalized to height); XcpI-specific, parallel-transformed capacitive reactance index (normalized to segment length). | | | | | | | | | | | | | | | |

**Supplementary Table 6.** Sex-stratified linear regression models exploring the prospective unadjusted association between regional raw bioelectrical impedance analysis variables and regional DXA-derived body components (by limb and dominance; *n=562*).

|  | | Δ **Lean Soft Tissue** | | | |  | Δ **Fat Mass** | | | |  | Δ **Bone Mineral Content** | | | |
| --- | --- | --- | --- | --- | --- | --- | --- | --- | --- | --- | --- | --- | --- | --- | --- |
|  | | Arm | | Leg | |  | Arm | | Leg | |  | Arm | | Leg | |
|  | | *Dom* | *Non Dom* | *Dom* | *Non Dom* |  | *Dom* | *Non Dom* | *Dom* | *Non Dom* |  | *Dom* | *Non Dom* | *Dom* | *Non Dom* |
| ***Females*** *(n=290)* | | | | | | | | | | | | | | | |
| Δ PhA | β | 0.088 | 0.072 | 0.023 | 0.042 |  | 0.146 | 0.153 | 0.052 | 0.027 |  | 0.053 | 0.072 | 0.051 | 0.020 |
| R2 | 1.506 | 1.213 | 0.161 | 0.420 |  | 0.502 | 0.664 | 0.158 | 0.033 |  | 0.545 | 0.914 | 0.790 | 0.095 |
| *p-value* | 0.037 | 0.061 | 0.497 | 0.271 |  | 0.230 | 0.166 | 0.501 | 0.759 |  | 0.211 | 0.104 | 0.131 | 0.601 |
| BH-FDR | 0.050 | 0.050 | 0.050 | 0.050 |  | 0.006 | 0.006 | 0.050 | 0.044 |  | 0.050 | 0.050 | 0.038 | 0.044 |
| Δ RI | β | -0.766 | -0.597 | -0.336 | -0.248 |  | 0.015 | -0.006 | 0.359 | 0.110 |  | -0.614 | -0.577 | -0.222 | -0.171 |
| R2 | 30.692 | 27.354 | 8.389 | 5.476 |  | 0.001 | 0.000 | 1.844 | 0.204 |  | 19.485 | 19.238 | 3.650 | 2.481 |
| *p-value* | <0.001 | <0.001 | <0.001 | <0.001 |  | 0.949 | 0.974 | 0.021 | 0.444 |  | <0.001 | <0.001 | 0.001 | 0.007 |
| BH-FDR | 0.006 | 0.006 | 0.019 | 0.013 |  | 0.050 | 0.044 | 0.013 | 0.019 |  | 0.013 | 0.013 | 0.019 | 0.013 |
| Δ RI-specific | β | -0.640 | -0.526 | -0.380 | -0.308 |  | -0.098 | -0.051 | 0.323 | 0.112 |  | -0.569 | -0.544 | -0.307 | -0.265 |
| R2 | 26.369 | 25.081 | 14.024 | 10.532 |  | 0.076 | 0.028 | 1.953 | 0.265 |  | 20.605 | 20.333 | 9.082 | 7.422 |
| *p-value* | <0.001 | <0.001 | <0.001 | <0.001 |  | 0.641 | 0.776 | 0.017 | 0.383 |  | <0.001 | <0.001 | <0.001 | <0.001 |
| BH-FDR | 0.013 | 0.013 | 0.006 | 0.006 |  | 0.025 | 0.025 | 0.006 | 0.006 |  | 0.006 | 0.006 | 0.006 | 0.006 |
| Δ XcI | β | -0.127 | -0.124 | -0.058 | -0.054 |  | 0.115 | 0.109 | 0.116 | 0.062 |  | -0.120 | -0.118 | -0.011 | -0.045 |
| R2 | 3.369 | 4.041 | 1.151 | 0.746 |  | 0.339 | 0.375 | 0.869 | 0.184 |  | 2.983 | 2.777 | 0.042 | 0.480 |
| *p-value* | 0.002 | 0.001 | 0.068 | 0.142 |  | 0.324 | 0.299 | 0.113 | 0.467 |  | 0.003 | 0.004 | 0.727 | 0.240 |
| BH-FDR | 0.044 | 0.044 | 0.044 | 0.044 |  | 0.013 | 0.013 | 0.038 | 0.031 |  | 0.044 | 0.038 | 0.050 | 0.038 |
| Δ XcI-specific | β | -0.129 | -0.123 | -0.095 | -0.099 |  | 0.088 | 0.091 | 0.128 | 0.070 |  | -0.131 | -0.125 | -0.053 | -0.098 |
| R2 | 3.697 | 4.328 | 3.111 | 2.654 |  | 0.211 | 0.285 | 1.068 | 0.249 |  | 3.782 | 3.400 | 0.958 | 2.475 |
| *p-value* | 0.001 | <0.001 | 0.003 | 0.005 |  | 0.438 | 0.366 | 0.079 | 0.397 |  | 0.001 | 0.002 | 0.096 | 0.007 |
| BH-FDR | 0.038 | 0.038 | 0.031 | 0.031 |  | 0.019 | 0.019 | 0.031 | 0.013 |  | 0.038 | 0.031 | 0.031 | 0.019 |
| Δ XcpI | β | -0.362 | -0.284 | -0.186 | -0.126 |  | 0.018 | 0.002 | 0.129 | 0.012 |  | -0.271 | -0.258 | -0.121 | -0.088 |
| R2 | 21.236 | 19.846 | 8.983 | 5.131 |  | 0.006 | 0.000 | 0.830 | 0.009 |  | 11.786 | 12.268 | 3.750 | 2.371 |
| *p-value* | <0.001 | <0.001 | <0.001 | <0.001 |  | 0.892 | 0.983 | 0.122 | 0.874 |  | <0.001 | <0.001 | 0.001 | 0.009 |
| BH-FDR | 0.019 | 0.025 | 0.013 | 0.019 |  | 0.038 | 0.050 | 0.044 | 0.050 |  | 0.025 | 0.025 | 0.013 | 0.025 |
| Δ XcpI-specific | β | -0.348 | -0.279 | -0.170 | -0.118 |  | -0.029 | -0.015 | 0.178 | 0.053 |  | -0.282 | -0.266 | -0.110 | -0.082 |
| R2 | 20.659 | 20.023 | 8.164 | 4.846 |  | 0.017 | 0.007 | 1.718 | 0.190 |  | 13.496 | 13.797 | 3.414 | 2.225 |
| *p-value* | <0.001 | <0.001 | <0.001 | <0.001 |  | 0.825 | 0.887 | 0.026 | 0.460 |  | <0.001 | <0.001 | 0.002 | 0.011 |
| BH-FDR | 0.025 | 0.019 | 0.025 | 0.025 |  | 0.031 | 0.031 | 0.019 | 0.025 |  | 0.019 | 0.019 | 0.025 | 0.031 |
| Δ Cap | β | 0.243 | 0.106 | 0.071 | 0.051 |  | 0.009 | -0.007 | -0.139 | -0.035 |  | 0.155 | 0.090 | 0.020 | 0.001 |
| R2 | 10.039 | 4.787 | 1.891 | 1.173 |  | 0.002 | 0.002 | 1.409 | 0.108 |  | 4.031 | 2.616 | 0.157 | 0.001 |
| *p-value* | <0.001 | <0.001 | 0.019 | 0.066 |  | 0.947 | 0.934 | 0.044 | 0.577 |  | 0.001 | 0.006 | 0.502 | 0.964 |
| BH-FDR | 0.031 | 0.031 | 0.038 | 0.038 |  | 0.044 | 0.038 | 0.025 | 0.038 |  | 0.031 | 0.044 | 0.044 | 0.050 |
| ***Males*** *(n=272)* | | | | | | | | | | | | | | | |
| Δ PhA | β | 0.150 | 0.191 | 0.083 | 0.089 |  | -0.101 | -0.187 | -0.094 | -0.332 |  | 0.165 | 0.196 | 0.141 | 0.126 |
| R2 | 3.835 | 5.891 | 1.288 | 1.256 |  | 0.187 | 0.755 | 0.237 | 2.941 |  | 4.350 | 5.721 | 2.969 | 2.332 |
| *p-value* | 0.001 | <0.001 | 0.062 | 0.065 |  | 0.478 | 0.154 | 0.424 | 0.005 |  | 0.001 | <0.001 | 0.004 | 0.012 |
| BH-FDR | 0.050 | 0.050 | 0.050 | 0.050 |  | 0.025 | 0.006 | 0.013 | 0.006 |  | 0.038 | 0.038 | 0.044 | 0.050 |
| Δ RI | β | -0.864 | -0.822 | -0.492 | -0.676 |  | 0.396 | 0.193 | 0.018 | 0.116 |  | -0.700 | -0.694 | -0.448 | -0.594 |
| R2 | 49.050 | 47.006 | 24.759 | 36.459 |  | 1.101 | 0.345 | 0.005 | 0.180 |  | 30.238 | 30.720 | 16.548 | 26.105 |
| *p-value* | <0.001 | <0.001 | <0.001 | <0.001 |  | 0.084 | 0.335 | 0.909 | 0.486 |  | <0.001 | <0.001 | <0.001 | <0.001 |
| BH-FDR | 0.006 | 0.006 | 0.013 | 0.013 |  | 0.006 | 0.013 | 0.050 | 0.031 |  | 0.006 | 0.006 | 0.013 | 0.013 |
| Δ RI-specific | β | -0.752 | -0.712 | -0.502 | -0.619 |  | 0.253 | 0.031 | 0.129 | 0.179 |  | -0.595 | -0.602 | -0.482 | -0.577 |
| R2 | 43.946 | 41.117 | 32.846 | 42.536 |  | 0.532 | 0.010 | 0.315 | 0.601 |  | 25.646 | 27.249 | 24.407 | 34.215 |
| *p-value* | <0.001 | <0.001 | <0.001 | <0.001 |  | 0.232 | 0.869 | 0.357 | 0.203 |  | <0.001 | <0.001 | <0.001 | <0.001 |
| BH-FDR | 0.013 | 0.013 | 0.006 | 0.006 |  | 0.013 | 0.044 | 0.006 | 0.019 |  | 0.013 | 0.013 | 0.006 | 0.006 |
| Δ XcI | β | -0.197 | -0.183 | -0.191 | -0.202 |  | 0.059 | -0.062 | -0.045 | -0.177 |  | -0.126 | -0.126 | -0.129 | -0.148 |
| R2 | 8.014 | 6.783 | 7.918 | 9.077 |  | 0.076 | 0.105 | 0.063 | 1.183 |  | 3.044 | 2.933 | 2.918 | 4.533 |
| *p-value* | <0.001 | <0.001 | <0.001 | <0.001 |  | 0.651 | 0.596 | 0.681 | 0.073 |  | 0.004 | 0.005 | 0.005 | <0.001 |
| BH-FDR | 0.044 | 0.038 | 0.044 | 0.044 |  | 0.038 | 0.031 | 0.025 | 0.013 |  | 0.044 | 0.044 | 0.050 | 0.044 |
| Δ XcI-specific | β | -0.190 | -0.175 | -0.241 | -0.245 |  | 0.030 | -0.108 | 0.031 | -0.104 |  | -0.111 | -0.120 | -0.197 | -0.207 |
| R2 | 8.079 | 6.585 | 14.105 | 15.090 |  | 0.022 | 0.338 | 0.034 | 0.459 |  | 2.582 | 2.846 | 7.557 | 9.992 |
| *p-value* | <0.001 | <0.001 | <0.001 | <0.001 |  | 0.809 | 0.342 | 0.761 | 0.266 |  | 0.008 | 0.006 | <0.001 | <0.001 |
| BH-FDR | 0.038 | 0.044 | 0.038 | 0.038 |  | 0.044 | 0.019 | 0.031 | 0.025 |  | 0.050 | 0.050 | 0.038 | 0.038 |
| Δ XcpI | β | -0.468 | -0.439 | -0.229 | -0.350 |  | 0.107 | -0.013 | -0.038 | 0.033 |  | -0.361 | -0.362 | -0.207 | -0.304 |
| R2 | 39.516 | 38.253 | 20.484 | 34.409 |  | 0.220 | 0.004 | 0.080 | 0.052 |  | 22.018 | 23.844 | 13.438 | 24.093 |
| *p-value* | <0.001 | <0.001 | <0.001 | <0.001 |  | 0.441 | 0.916 | 0.642 | 0.709 |  | <0.001 | <0.001 | <0.001 | <0.001 |
| BH-FDR | 0.019 | 0.019 | 0.025 | 0.019 |  | 0.019 | 0.050 | 0.019 | 0.044 |  | 0.019 | 0.019 | 0.025 | 0.025 |
| Δ XcpI-specific | β | -0.439 | -0.410 | -0.226 | -0.338 |  | 0.072 | -0.062 | -0.018 | 0.045 |  | -0.332 | -0.339 | -0.206 | -0.299 |
| R2 | 38.061 | 35.918 | 20.980 | 34.369 |  | 0.109 | 0.109 | 0.019 | 0.101 |  | 20.208 | 22.711 | 14.028 | 25.025 |
| *p-value* | <0.001 | <0.001 | <0.001 | <0.001 |  | 0.589 | 0.589 | 0.820 | 0.602 |  | <0.001 | <0.001 | <0.001 | <0.001 |
| BH-FDR | 0.025 | 0.025 | 0.019 | 0.025 |  | 0.031 | 0.025 | 0.038 | 0.038 |  | 0.025 | 0.025 | 0.019 | 0.019 |
| Δ Cap | β | 0.363 | 0.342 | 0.178 | 0.306 |  | -0.018 | 0.017 | 0.013 | -0.006 |  | 0.260 | 0.260 | 0.152 | 0.238 |
| R2 | 33.066 | 32.160 | 15.003 | 25.930 |  | 0.008 | 0.011 | 0.011 | 0.002 |  | 15.889 | 17.048 | 8.859 | 14.500 |
| *p-value* | <0.001 | <0.001 | <0.001 | <0.001 |  | 0.880 | 0.863 | 0.864 | 0.942 |  | <0.001 | <0.001 | <0.001 | <0.001 |
| BH-FDR | 0.031 | 0.031 | 0.031 | 0.031 |  | 0.050 | 0.038 | 0.044 | 0.050 |  | 0.031 | 0.031 | 0.031 | 0.031 |
| Models: M1, unadjusted model.  Abbreviations: Δ, proportion of change relative to baseline; β, unstandardized regression coefficient; BH-FDR, Benjamini–Hochberg False Discovery Rate; Cap, capacitance; Dom, dominant side; Non-Dom, non-dominant side; PhA, phase angle; R2, coefficient of determination; RI, resistance index (normalized to height); RI-specific, resistance index (normalized to segment length); XcI, capacitive reactance index (normalized to height); XcI-specific, capacitive reactance index (normalized to segment length); XcpI, parallel-transformed capacitive reactance index (normalized to height); XcpI-specific, parallel-transformed capacitive reactance index (normalized to segment length) | | | | | | | | | | | | | | | |

**Supplementary Table 7.** Sex-stratified linear regression models exploring the prospective adjusted association between regional raw bioelectrical impedance analysis variables and regional DXA-derived body components (by limb and dominance; *n=562*).

|  | | Δ **Lean Soft Tissue** | | | |  | Δ **Fat Mass** | | | |  | Δ **Bone Mineral Content** | | | |
| --- | --- | --- | --- | --- | --- | --- | --- | --- | --- | --- | --- | --- | --- | --- | --- |
| Arm | | Leg | |  | Arm | | Leg | |  | Arm | | Leg | |
| *Dom* | *Non Dom* | *Dom* | *Non Dom* |  | *Dom* | *Non Dom* | *Dom* | *Non Dom* |  | *Dom* | *Non Dom* | *Dom* | *Non Dom* |
| ***Females*** *(n=290)* | | | | | | | | | | | | | | | |
| Δ PhA | *β* | 0.225 | 0.203 | 0.038 | 0.126 |  | -0.014 | -0.062 | -0.032 | -0.071 |  | 0.088 | 0.045 | 0.026 | 0.013 |
| R2Part | 2.984 | 2.458 | 0.097 | 1.049 |  | 0.013 | 0.224 | 0.062 | 0.310 |  | 0.481 | 0.132 | 0.047 | 0.012 |
| *p-value* | <0.001 | 0.001 | 0.516 | 0.034 |  | 0.823 | 0.358 | 0.626 | 0.269 |  | 0.082 | 0.356 | 0.592 | 0.782 |
| BH-FDR | 0.038 | 0.038 | 0.050 | 0.038 |  | 0.044 | 0.019 | 0.038 | 0.013 |  | 0.050 | 0.050 | 0.050 | 0.050 |
| AIC | 2022.036 | 2033.726 | 1975.460 | 1975.955 |  | 2704.663 | 2700.556 | 2492.597 | 2482.338 |  | 1965.822 | 2011.604 | 1881.068 | 1869.598 |
| Δ RI | *β* | -0.442 | -0.443 | -0.263 | -0.219 |  | 0.025 | 0.014 | 0.094 | -0.004 |  | -0.253 | -0.262 | -0.136 | -0.138 |
| R2Part | 13.228 | 11.111 | 4.806 | 3.305 |  | 0.043 | 0.012 | 0.664 | 0.001 |  | 4.456 | 4.193 | 1.345 | 1.390 |
| *p-value* | <0.001 | <0.001 | <0.001 | <0.001 |  | 0.676 | 0.831 | 0.105 | 0.941 |  | <0.001 | <0.001 | 0.004 | 0.002 |
| BH-FDR | 0.006 | 0.013 | 0.025 | 0.025 |  | 0.019 | 0.044 | 0.025 | 0.044 |  | 0.019 | 0.013 | 0.025 | 0.031 |
| AIC | 1970.728 | 1994.287 | 1948.243 | 1965.706 |  | 2708.064 | 2692.405 | 2472.253 | 2474.557 |  | 1911.436 | 1951.374 | 1859.181 | 1855.064 |
| Δ RI-specific | *β* | -0.423 | -0.454 | -0.358 | -0.333 |  | 0.013 | 0.008 | 0.147 | 0.046 |  | -0.285 | -0.303 | -0.218 | -0.229 |
| R2Part | 12.503 | 11.709 | 8.272 | 7.135 |  | 0.012 | 0.004 | 1.470 | 0.147 |  | 5.878 | 5.790 | 3.174 | 3.514 |
| *p-value* | <0.001 | <0.001 | <0.001 | <0.001 |  | 0.823 | 0.904 | 0.016 | 0.440 |  | <0.001 | <0.001 | <0.001 | <0.001 |
| BH-FDR | 0.013 | 0.006 | 0.006 | 0.006 |  | 0.038 | 0.050 | 0.006 | 0.019 |  | 0.006 | 0.006 | 0.006 | 0.006 |
| AIC | 1966.544 | 1985.566 | 1924.335 | 1943.307 |  | 2697.455 | 2681.115 | 2469.199 | 2474.051 |  | 1870.807 | 1909.443 | 1831.730 | 1823.621 |
| Δ XcI | *β* | -0.111 | -0.113 | -0.128 | -0.047 |  | -0.053 | -0.123 | -0.026 | -0.091 |  | -0.154 | -0.174 | -0.086 | -0.096 |
| R2Part | 0.711 | 0.739 | 1.077 | 0.164 |  | 0.156 | 0.830 | 0.040 | 0.575 |  | 1.367 | 1.725 | 0.480 | 0.657 |
| *p-value* | 0.063 | 0.074 | 0.030 | 0.404 |  | 0.425 | 0.070 | 0.693 | 0.126 |  | 0.003 | 0.001 | 0.084 | 0.036 |
| BH-FDR | 0.050 | 0.050 | 0.044 | 0.050 |  | 0.013 | 0.013 | 0.044 | 0.006 |  | 0.044 | 0.038 | 0.038 | 0.038 |
| AIC | 2037.062 | 2044.196 | 1971.858 | 1979.771 |  | 2698.696 | 2685.319 | 2491.905 | 2472.915 |  | 1954.719 | 1995.380 | 1873.031 | 1860.829 |
| Δ XcI-specific | *β* | -0.134 | -0.136 | -0.172 | -0.104 |  | -0.057 | -0.121 | 0.018 | -0.035 |  | -0.183 | -0.204 | -0.122 | -0.138 |
| R2Part | 1.084 | 1.084 | 2.092 | 0.830 |  | 0.191 | 0.833 | 0.021 | 0.089 |  | 2.029 | 2.396 | 1.023 | 1.404 |
| *p-value* | 0.022 | 0.031 | 0.002 | 0.058 |  | 0.376 | 0.069 | 0.775 | 0.549 |  | <0.001 | <0.001 | 0.010 | 0.002 |
| BH-FDR | 0.044 | 0.044 | 0.038 | 0.044 |  | 0.006 | 0.006 | 0.050 | 0.025 |  | 0.038 | 0.031 | 0.031 | 0.025 |
| AIC | 2029.241 | 2037.015 | 1965.760 | 1974.246 |  | 2686.007 | 2672.723 | 2491.644 | 2475.033 |  | 1924.199 | 1963.959 | 1863.019 | 1846.796 |
| Δ XcpI | *β* | -0.365 | -0.360 | -0.286 | -0.217 |  | 0.015 | 0.016 | 0.059 | -0.025 |  | -0.215 | -0.200 | -0.142 | -0.147 |
| R2Part | 10.449 | 8.879 | 6.158 | 3.478 |  | 0.017 | 0.019 | 0.271 | 0.048 |  | 3.684 | 2.855 | 1.549 | 1.642 |
| *p-value* | <0.001 | <0.001 | <0.001 | <0.001 |  | 0.793 | 0.788 | 0.304 | 0.662 |  | <0.001 | <0.001 | 0.002 | 0.001 |
| BH-FDR | 0.025 | 0.025 | 0.019 | 0.019 |  | 0.031 | 0.031 | 0.031 | 0.031 |  | 0.025 | 0.025 | 0.019 | 0.019 |
| AIC | 1982.134 | 2006.320 | 1952.903 | 1972.606 |  | 2702.005 | 2697.445 | 2476.724 | 2478.160 |  | 1913.913 | 1967.929 | 1858.501 | 1852.460 |
| Δ XcpI-specific | *β* | -0.377 | -0.381 | -0.310 | -0.246 |  | 0.012 | 0.015 | 0.100 | 0.010 |  | -0.241 | -0.228 | -0.156 | -0.168 |
| R2Part | 11.048 | 9.711 | 6.813 | 4.241 |  | 0.011 | 0.016 | 0.747 | 0.007 |  | 4.659 | 3.673 | 1.780 | 2.041 |
| *p-value* | <0.001 | <0.001 | <0.001 | <0.001 |  | 0.834 | 0.803 | 0.087 | 0.864 |  | <0.001 | <0.001 | 0.001 | <0.001 |
| BH-FDR | 0.019 | 0.019 | 0.013 | 0.013 |  | 0.050 | 0.038 | 0.019 | 0.038 |  | 0.013 | 0.019 | 0.013 | 0.013 |
| AIC | 1971.380 | 1996.060 | 1933.246 | 1960.016 |  | 2691.524 | 2686.519 | 2474.376 | 2478.066 |  | 1883.559 | 1937.785 | 1849.706 | 1841.832 |
| Δ Cap | *β* | 0.323 | 0.223 | 0.202 | 0.196 |  | -0.020 | -0.054 | -0.107 | -0.002 |  | 0.159 | 0.105 | 0.074 | 0.085 |
| R2Part | 8.938 | 3.810 | 3.267 | 2.929 |  | 0.034 | 0.224 | 0.923 | 0.000 |  | 2.185 | 0.871 | 0.442 | 0.566 |
| *p-value* | <0.001 | <0.001 | <0.001 | <0.001 |  | 0.712 | 0.362 | 0.060 | 0.974 |  | <0.001 | 0.015 | 0.098 | 0.052 |
| BH-FDR | 0.031 | 0.031 | 0.031 | 0.031 |  | 0.025 | 0.025 | 0.013 | 0.050 |  | 0.031 | 0.044 | 0.044 | 0.044 |
| AIC | 1983.498 | 2025.672 | 1950.852 | 1967.306 |  | 2705.480 | 2704.500 | 2482.077 | 2483.895 |  | 1944.631 | 1995.349 | 1867.995 | 1864.376 |
| ***Males*** *(n=272)* | | | | | | | | | | | | | | | |
| Δ PhA | *β* | 0.219 | 0.320 | 0.136 | 0.109 |  | -0.063 | -0.119 | -0.102 | -0.179 |  | 0.204 | 0.244 | 0.163 | 0.110 |
| R2Part | 2.459 | 6.312 | 1.024 | 0.709 |  | 0.213 | 0.884 | 0.506 | 1.738 |  | 2.417 | 3.955 | 1.515 | 0.741 |
| *p-value* | 0.001 | <0.001 | 0.027 | 0.068 |  | 0.377 | 0.085 | 0.187 | 0.015 |  | 0.002 | <0.001 | 0.005 | 0.046 |
| BH-FDR | 0.050 | 0.038 | 0.050 | 0.050 |  | 0.006 | 0.013 | 0.006 | 0.006 |  | 0.050 | 0.050 | 0.050 | 0.050 |
| AIC | 1963.506 | 1983.929 | 1847.871 | 1876.598 |  | 2621.127 | 2578.244 | 2464.674 | 2447.097 |  | 1989.790 | 2028.765 | 1876.898 | 1860.099 |
| Δ RI | *β* | -0.573 | -0.593 | -0.456 | -0.463 |  | 0.004 | -0.019 | -0.042 | 0.005 |  | -0.421 | -0.484 | -0.340 | -0.331 |
| R2Part | 23.920 | 26.262 | 14.504 | 15.196 |  | 0.001 | 0.028 | 0.131 | 0.002 |  | 12.811 | 17.380 | 8.461 | 7.913 |
| *p-value* | <0.001 | <0.001 | <0.001 | <0.001 |  | 0.954 | 0.762 | 0.500 | 0.938 |  | <0.001 | <0.001 | <0.001 | <0.001 |
| BH-FDR | 0.006 | 0.006 | 0.019 | 0.019 |  | 0.050 | 0.044 | 0.038 | 0.050 |  | 0.006 | 0.006 | 0.013 | 0.013 |
| AIC | 1846.179 | 1873.327 | 1773.600 | 1793.916 |  | 2622.778 | 2582.387 | 2463.311 | 2454.410 |  | 1901.131 | 1903.203 | 1828.608 | 1804.849 |
| Δ RI-specific | *β* | -0.545 | -0.544 | -0.482 | -0.493 |  | -0.030 | -0.073 | -0.024 | 0.032 |  | -0.382 | -0.444 | -0.368 | -0.375 |
| R2Part | 23.090 | 23.438 | 14.896 | 15.150 |  | 0.071 | 0.418 | 0.039 | 0.064 |  | 11.345 | 15.522 | 9.001 | 8.863 |
| *p-value* | <0.001 | <0.001 | <0.001 | <0.001 |  | 0.613 | 0.240 | 0.712 | 0.644 |  | <0.001 | <0.001 | <0.001 | <0.001 |
| BH-FDR | 0.013 | 0.019 | 0.013 | 0.013 |  | 0.025 | 0.031 | 0.044 | 0.025 |  | 0.013 | 0.013 | 0.006 | 0.006 |
| AIC | 1832.509 | 1876.038 | 1767.814 | 1789.874 |  | 2602.394 | 2562.237 | 2464.721 | 2454.688 |  | 1877.585 | 1883.440 | 1819.704 | 1793.955 |
| Δ XcI | *β* | -0.318 | -0.280 | -0.281 | -0.282 |  | -0.027 | -0.085 | -0.060 | -0.111 |  | -0.262 | -0.293 | -0.198 | -0.201 |
| R2Part | 6.019 | 4.964 | 5.017 | 4.853 |  | 0.043 | 0.457 | 0.235 | 0.770 |  | 4.101 | 5.428 | 2.533 | 2.538 |
| *p-value* | <0.001 | <0.001 | <0.001 | <0.001 |  | 0.693 | 0.215 | 0.365 | 0.103 |  | <0.001 | <0.001 | <0.001 | <0.001 |
| BH-FDR | 0.044 | 0.050 | 0.044 | 0.044 |  | 0.038 | 0.025 | 0.013 | 0.013 |  | 0.044 | 0.044 | 0.044 | 0.044 |
| AIC | 1938.964 | 1981.528 | 1822.859 | 1850.721 |  | 2621.348 | 2578.729 | 2462.393 | 2446.062 |  | 1954.548 | 1993.602 | 1854.025 | 1832.027 |
| Δ XcI-specific | *β* | -0.341 | -0.275 | -0.284 | -0.279 |  | -0.046 | -0.125 | -0.054 | -0.099 |  | -0.252 | -0.285 | -0.203 | -0.205 |
| R2Part | 7.237 | 4.997 | 5.224 | 4.972 |  | 0.135 | 1.029 | 0.187 | 0.611 |  | 3.966 | 5.355 | 2.672 | 2.707 |
| *p-value* | <0.001 | <0.001 | <0.001 | <0.001 |  | 0.485 | 0.064 | 0.421 | 0.148 |  | <0.001 | <0.001 | <0.001 | <0.001 |
| BH-FDR | 0.038 | 0.044 | 0.038 | 0.038 |  | 0.019 | 0.006 | 0.031 | 0.019 |  | 0.038 | 0.038 | 0.038 | 0.038 |
| AIC | 1916.012 | 1967.830 | 1820.963 | 1848.488 |  | 2600.781 | 2558.098 | 2463.875 | 2448.027 |  | 1929.120 | 1968.747 | 1853.061 | 1831.045 |
| Δ XcpI | *β* | -0.507 | -0.522 | -0.414 | -0.438 |  | -0.029 | -0.057 | -0.051 | 0.007 |  | -0.361 | -0.419 | -0.311 | -0.311 |
| R2Part | 21.045 | 22.885 | 12.486 | 14.567 |  | 0.066 | 0.272 | 0.198 | 0.004 |  | 10.624 | 14.667 | 7.316 | 7.447 |
| *p-value* | <0.001 | <0.001 | <0.001 | <0.001 |  | 0.623 | 0.341 | 0.405 | 0.910 |  | <0.001 | <0.001 | <0.001 | <0.001 |
| BH-FDR | 0.031 | 0.025 | 0.025 | 0.025 |  | 0.031 | 0.038 | 0.019 | 0.044 |  | 0.019 | 0.019 | 0.025 | 0.019 |
| AIC | 1868.023 | 1894.383 | 1800.047 | 1814.477 |  | 2622.510 | 2581.489 | 2461.117 | 2451.300 |  | 1926.017 | 1931.580 | 1841.701 | 1813.996 |
| Δ XcpI-specific | *β* | -0.507 | -0.506 | -0.411 | -0.433 |  | -0.044 | -0.086 | -0.051 | 0.009 |  | -0.346 | -0.405 | -0.309 | -0.315 |
| R2Part | 21.508 | 21.902 | 11.776 | 13.508 |  | 0.161 | 0.627 | 0.191 | 0.006 |  | 10.012 | 14.027 | 6.939 | 7.216 |
| *p-value* | <0.001 | <0.001 | <0.001 | <0.001 |  | 0.446 | 0.150 | 0.415 | 0.890 |  | <0.001 | <0.001 | <0.001 | <0.001 |
| BH-FDR | 0.025 | 0.031 | 0.031 | 0.031 |  | 0.013 | 0.019 | 0.025 | 0.038 |  | 0.025 | 0.025 | 0.031 | 0.025 |
| AIC | 1850.461 | 1886.172 | 1791.342 | 1805.653 |  | 2602.079 | 2561.420 | 2462.195 | 2451.916 |  | 1900.567 | 1905.900 | 1840.911 | 1812.465 |
| Δ Cap | *β* | 0.520 | 0.551 | 0.449 | 0.444 |  | -0.004 | -0.008 | -0.015 | -0.020 |  | 0.316 | 0.375 | 0.321 | 0.276 |
| R2Part | 22.693 | 25.915 | 15.113 | 15.556 |  | 0.001 | 0.005 | 0.017 | 0.031 |  | 8.508 | 12.095 | 8.019 | 6.147 |
| *p-value* | <0.001 | <0.001 | <0.001 | <0.001 |  | 0.948 | 0.894 | 0.805 | 0.745 |  | <0.001 | <0.001 | <0.001 | <0.001 |
| BH-FDR | 0.019 | 0.013 | 0.006 | 0.006 |  | 0.044 | 0.050 | 0.050 | 0.031 |  | 0.031 | 0.031 | 0.019 | 0.031 |
| AIC | 1856.873 | 1879.333 | 1771.574 | 1795.416 |  | 2619.757 | 2576.141 | 2457.154 | 2446.134 |  | 1962.626 | 1992.354 | 1847.585 | 1834.958 |
| Models: M2, model adjusted for ethnicity, presence of chronic diseases, BMI, age at baseline, each raw bioelectrical impedance variable at baseline, and each body component at baseline.  Abbreviations: Δ, proportion of change relative to baseline; AIC, Akaike Information Criterion; BH-FDR, *β*, standardized regression coefficient; Benjamini-Hochberg False Discovery Rate; Cap, capacitance; Dom, dominant side; Non-Dom, non-dominant side; PhA, phase angle; R2Part, semi-partial coefficient of determination; RI, resistance index (normalized to height); RI-specific, resistance index (normalized to segment length); XcI, capacitive reactance index (normalized to height); XcI-specific, capacitive reactance index (normalized to segment length); XcpI, parallel-transformed capacitive reactance index (normalized to height); XcpI-specific, parallel-transformed capacitive reactance index (normalized to segment length). | | | | | | | | | | | | | | | |
