# Supplementary material
Source: Research Square preprint supplement (doi:10.21203/rs.3.rs-9224431/v1)
Supplement: Supplementary file 7 [file f9bfbabdb334086c5d1f2b17.docx]

| **Supplementary Table 1.** General characterization of chronic disease and health conditions, in cross-sectional and prospective analytical samples, according to the Anatomical Therapeutic Chemical Classification System. | | | | | | |
| --- | --- | --- | --- | --- | --- | --- |
|  | **Cross-sectional analytical sample (n=613)** | | | **Prospective analytical sample (n=562)** | | |
| **Chronic disease or health condition – IC10** | **Total***  **(n=106)** | **Females***  **(n=61)** | **Males***  **(n=45)** | **Total***  **(n=97)** | **Females***  **(n=57)** | **Males***  **(n=40)** |
| Certain infectious and parasitic diseases | 1 | 0 | 1 | 1 | 0 | 1 |
| Diseases of the skin and subcutaneous tissue | 1 | 0 | 1 | 1 | 0 | 1 |
| Diseases of the circulatory system | 2 | 2 | 0 | 2 | 2 | 0 |
| Diseases of the digestive system | 3 | 1 | 2 | 3 | 1 | 2 |
| Diseases of the genitourinary system | 1 | 1 | 0 | 1 | 1 | 0 |
| Diseases of the respiratory system | 56 | 23 | 33 | 49 | 20 | 29 |
| Diseases of the blood and blood-forming organs and certain disorders involving the immune mechanism | 3 | 2 | 1 | 3 | 2 | 1 |
| Diseases of the nervous system | 3 | 2 | 1 | 2 | 1 | 1 |
| Diseases of the musculoskeletal system and connective tissue | 41 | 34 | 7 | 40 | 34 | 6 |
| Mental and behavioral disorders | 2 | 2 | 0 | 2 | 2 | 0 |
| Abbreviations: ATC, Anatomical Therapeutic Chemical Classification System | | | | | | |
